## Classes and continua of hippocampal CA1 inhibitory neurons revealed by single-cell transcriptomics

Kenneth D. Harris<sup>1,2\*</sup>, Carolina Bengtsson Gonzales<sup>3</sup>, Hannah Hochgerner<sup>3</sup>, Nathan G. Skene<sup>3</sup>, Lorenza Magno<sup>4</sup>, Linda Katona<sup>5</sup>, Peter Somogyi<sup>5</sup>, Nicoletta Kessaris<sup>4</sup>, Sten Linnarsson<sup>3</sup>, Jens Hjerling-Leffler<sup>3</sup>

1 – UCL Institute of Neurology, Queen Square, London WC1N 3BG, UK

2 – UCL Department of Neuroscience, Physiology and Pharmacology, 21 University Street, London WC1E 6DE, UK

3 – Division of Molecular Neurobiology, Department of Medical Biochemistry and Biophysics, Karolinska Institutet, S-171 77 Stockholm, Sweden

4 – Wolfson Institute for Biomedical Research, University College London, Gower Street, London WC1E 6BT, UK

5 – Department of Pharmacology, University of Oxford, Mansfield Road, Oxford OX1 3QT, UK

\* Correspondence: [kenneth.harris@ucl.ac.uk](mailto:kenneth.harris@ucl.ac.uk)

Understanding any brain circuit will require a categorization of its constituent neurons. In hippocampal area CA1, at least 23 classes of GABAergic neuron have been proposed to date. However, this list may be incomplete; additionally, it is unclear whether discrete classes are sufficient to describe the diversity of cortical inhibitory neurons, or whether continuous modes of variability are also required. We studied the transcriptomes of 3663 CA1 inhibitory cells, revealing 10 major GABAergic groups that divided into 49 fine-scale clusters. All previously described and several novel cell classes were identified, with three previously-described classes unexpectedly found to be identical. A common continuous mode of variation modulated the expression of many genes, reflecting a range from metabolically highly active faster-spiking cells that proximally target pyramidal cells, to slower-spiking cells that target distal dendrites or interneurons. Within classes, cells showed further variability along the continuum and this correlated with their spiking phenotype. Surprisingly, several cell types previously described as discrete classes represented ranges along this continuum. These results elucidate the complexity of inhibitory neurons in one of the simplest cortical structures, and show that characterizing these cells requires continuous modes of variation as well as discrete cell classes.

### Introduction

Cortical circuits are composed of highly diverse neurons, and a clear definition of cortical cell types is essential for the explanation of their contribution to network activity patterns and behavior. Cortical diversity is strongest amongst GABAergic neurons. In hippocampal area CA1 – one of the architecturally simplest cortical structures – GABAergic neurons have been divided so far into at least 23 classes of distinct connectivity, firing patterns, and molecular content (Bezaire and Soltesz, 2013; Freund and Buzsaki, 1996; Klausberger and Somogyi, 2008; Somogyi, 2010; Wheeler et al., 2015). A complete categorization of CA1 inhibitory neurons would provide not only essential information to understand the computational mechanisms of the hippocampus, but also a canonical example to inform studies of more complex structures such as 6-layered isocortex.

CA1 GABAergic neurons have been divided into six major groups, based on connectivity and expression patterns of currently-used molecular markers. *Pvalb*-positive neurons (including basket, bistratified, and axo-axonic cells) target pyramidal cells' somata, proximal dendrites or axon initial segments, firing fast spikes that

lead to strong and rapid suppression of activity (Buhl et al., 1994; Hu et al., 2014). *Sst*-positive oriens/lacunosum-moleculare (O-LM) cells target pyramidal cell distal dendrites and exhibit slower firing patterns (Katona et al., 2014). GABAergic long-range projection cells send information to distal targets, and comprise many subtypes including SST-positive hippocamposeptal cells; NOS1-positive backprojection cells targeting dentate gyrus and CA3; and several classes of hippocampal cells including trilaminar, radiatum-retrohippocampal, and PENK-positive neurons (Fuentelba et al., 2008a; Jinno, 2009; Jinno et al., 2007; Sik et al., 1994; Takács et al., 2008). CCK-positive interneurons are a diverse class characterized by asynchronous neurotransmitter release (Daw et al., 2009; Hefft and Jonas, 2005), that have been divided into at least 5 subtypes targeting different points along the somadendritic axis of pyramidal cells (Armstrong and Soltesz, 2012; Cope et al., 2002; Klausberger et al., 2005; Pawelzik et al., 2002; Somogyi et al., 2004). Neurogliaform and Ivy cells release GABA diffusely from dense local axons and can mediate volume transmission as well as conventional synapses (Armstrong et al., 2012; Fuentelba et al., 2008b). Interneuron-selective (I-S)

interneurons comprise at least 3 subtypes specifically targeting other inhibitory neurons, and expressing one or both of *Vip* and *Calb2* (Acsady et al., 1996a, 1996b; Freund and Buzsaki, 1996; Gulyás et al., 1996). Finally, additional rare types such as large *Sst/Nos1* cells (Jinno and Kosaka, 2004) have been described at a molecular level, but their axonal targets and relationship to other subtypes is unclear.

This already complex picture likely underestimates the intricacy of CA1 inhibitory neurons. Currently defined classes likely divide into several further subtypes, and additional neuronal classes likely remain to be found (e.g. Katona et al., 2017). Furthermore, it is unclear whether a categorization into discrete classes is actually sufficient to describe the diversity of cortical inhibitory neurons (Markram et al., 2004; Parra et al., 1998). For example, several *Cck* interneuron classes have been described, targeting pyramidal cells at multiple locations ranging from their somata to distal dendrites, and the molecular profile of these cells correlates with their synaptic target location (Cope et al., 2002; Klausberger et al., 2005; Somogyi et al., 2004). Do such cells represent discrete classes with sharp inter-class boundaries, or do they represent points along a continuum? Furthermore, while a cell's large-scale axonal and dendritic structure likely remains fixed throughout life, both gene expression and electrophysiological properties can be modified by factors such as neuronal activity (Dehorter et al., 2015; Donato et al., 2013; Mardinly et al., 2016; Spiegel et al., 2014). To what extent is the observed molecular diversity of interneurons consistent with activity-dependent modulation of gene expression?

Single-cell RNA sequencing (scRNA-seq) – which can read out the expression levels of all genes in large numbers of individual cells – provides a powerful opportunity to address these questions. This method has successfully identified the major cell classes in several neuronal circuits (Habib et al., 2016, 2017; Macosko et al., 2015; Tasic et al., 2016; Usoskin et al., 2015; Zeisel et al., 2015). Nevertheless, identifying fine cortical cell classes has not been straightforward, due to both incomplete prior information on the underlying cell types, and to complicating factors such as potential continuous variability within these classes. The large body of prior work on CA1 interneurons provides a valuable opportunity to identify transcriptomic clusters with known cell types in an important cortical circuit, enabling confident identification of known and novel classes and investigation of questions such as continuous variability.

Here we describe a transcriptomic analysis of 3663 inhibitory neurons from mouse CA1. This analysis

revealed 49 clusters, of which we could identify 41 with previously described cell types, with the remaining eight representing putative novel cell types. All previously described CA1 GABAergic classes could be identified in our database, but our results unexpectedly suggest that three of them are identical. The larger number of clusters occurring in our transcriptomic analysis reflected several previously unappreciated subtypes of existing classes, and tiling of continua by multiple clusters. Our data suggest a common genetic continuum exists between and within classes, from faster-firing cells targeting principal cell somata and proximal dendrites, to slower-firing cells targeting distal dendrites or interneurons. Several classes previously described as discrete represent ranges along this continuum of gene expression. The degree to which genes change along the continuum correlates with their modulation by neuronal activity, and patch-seq recordings confirm that a cell's position along the continuum correlates with its spiking phenotype even within a single cell class.

## Results

### Data collection and identification of inhibitory cells

We collected cells from six *Slc32a1-Cre;R26R-tdTomato* mice, three of age p60 and three of age p27. Cells were procured using enzymatic digestion and manual dissociation of CA1 tissue after dissection as previously described (Zeisel 2015). The great majority of cells (4572/6971 cells total; 3283/3663 high-quality interneurons) came from the older animals. Because we observed no major difference in interneuron classes between ages, data was pooled between them (**Figure S1**). FACS sorting yielded an enriched, but not completely pure population of GABAergic neurons. A first-round clustering (using the method described below) was therefore run on the 5940 cells passing quality control, identifying 3663 GABAergic neurons (as judged by the expression of genes *Gad1* and *Slc32a1*).

### Cluster analysis

We analyzed the data using a suite of three algorithms, derived from a probabilistic model of RNA distributions. All three methods were based on the observation that RNA counts within a homogeneous population can be approximated using a negative binomial distribution (See methods; Lu et al., 2005; Robinson and Smyth, 2008). The negative binomial distribution accurately models the high variance of transcriptomic read counts (**Figure S2A,B**). As a consequence, algorithms based on this distribution weight the presence or absence of a gene more than its numerical expression level – for example,

CA1 inhibitory neurons

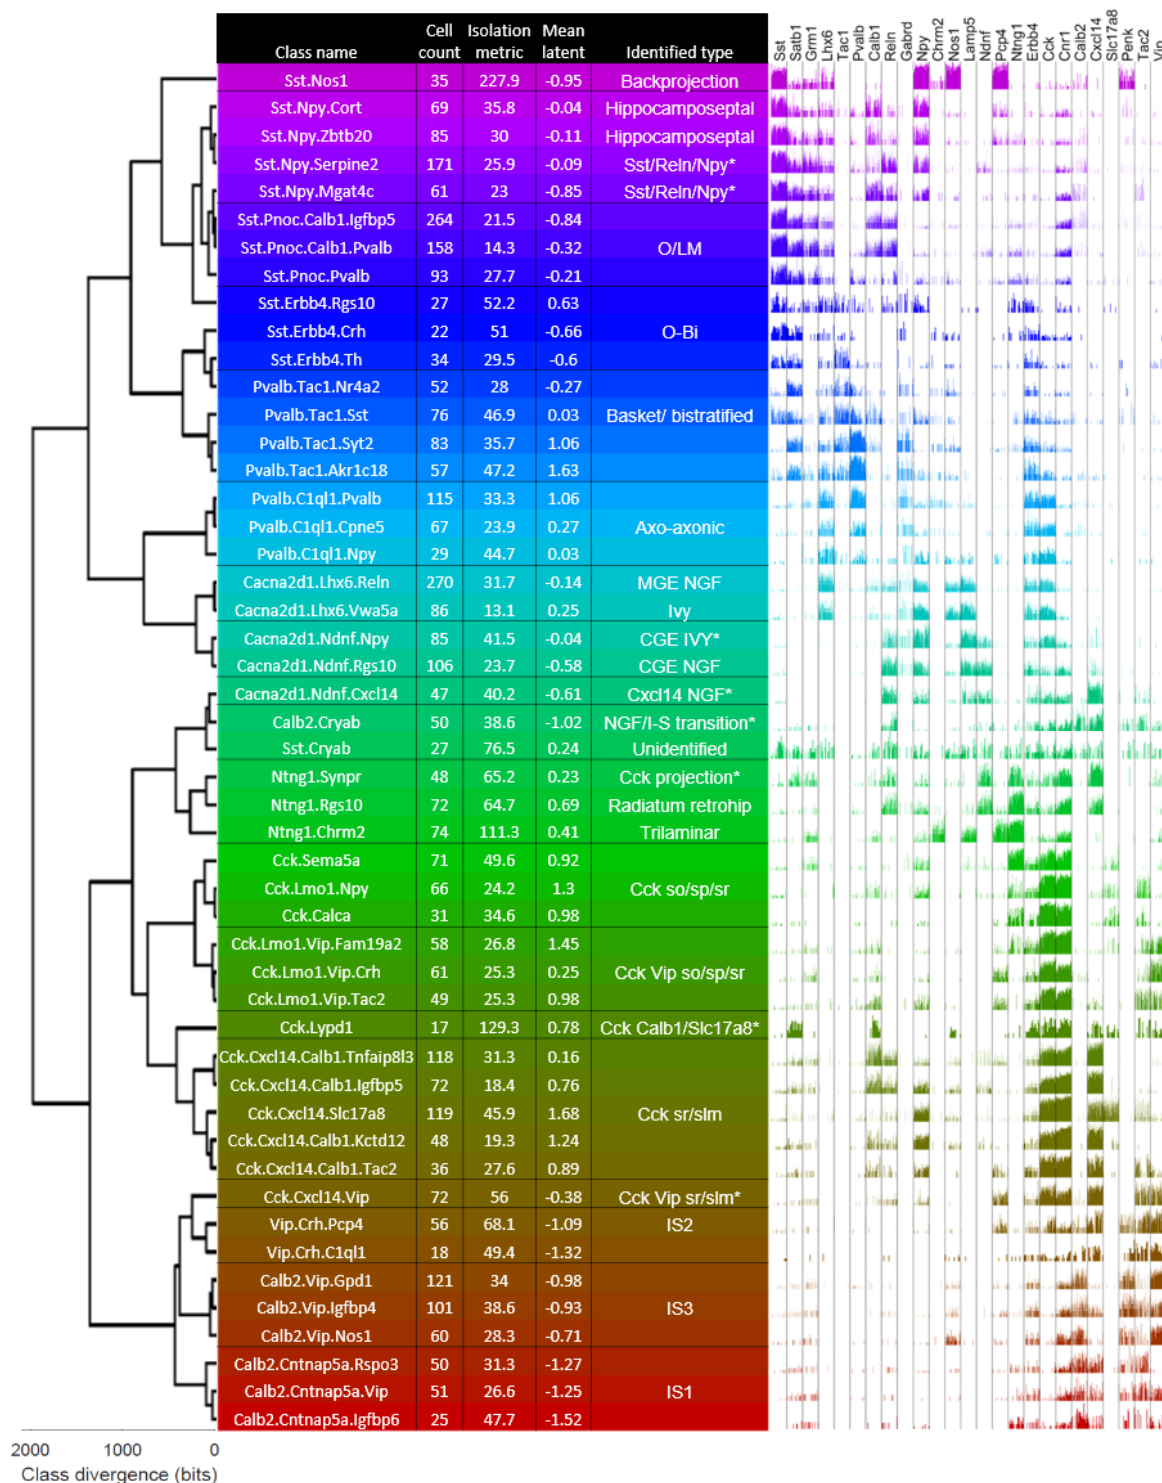

**Figure 1.** The ProMMT algorithm split CA1 GABAergic neurons into 49 clusters. Dendrogram (left) shows a hierarchical cluster analysis of these classes. Table shows class names (chosen hierarchically according to strongly expressed genes), number of cells per class, isolation metric of each class (higher for distinct classes), the mean value of latent variable analysis for cells in this class, and the biological cell type identified from its gene expression pattern. Asterisks indicating hypothesized novel classes. Right, bar chart showing log expression of 25 selected genes for all cells in the class.

this distribution treats read counts of 0 and 10 as more dissimilar than read counts of 500 and 1000 (Figure S2C).

The algorithm we used for clustering was termed ProMMT (Probabilistic Mixture Modeling for

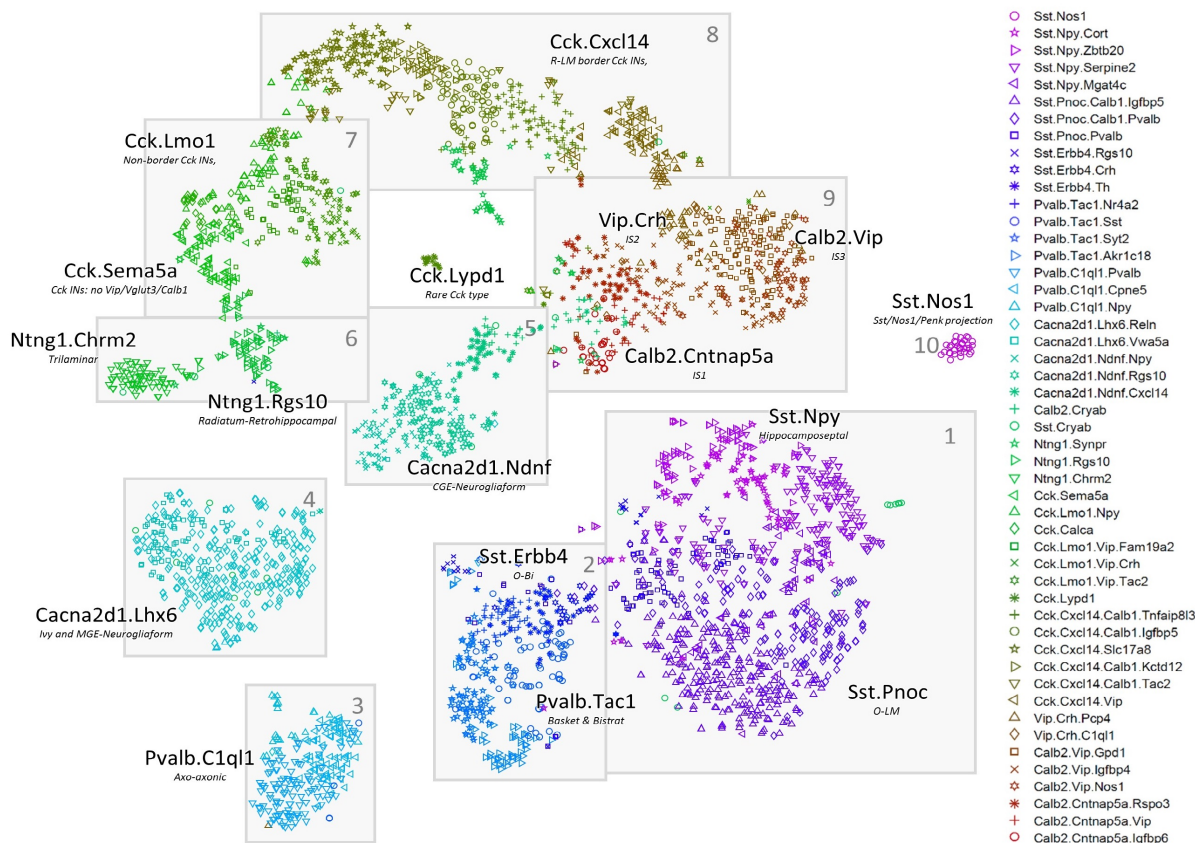

**Figure 2.** Two-dimensional visualization of expression patterns using nbtSNE algorithm, which places cells of similar expression close together. Each symbol represents a cell, with different color/glyph combinations representing different cell classes (legend, right). Grey boxes and numbers refer to the “continents” referred to in the text and subsequent figures.

Transcriptomics). This algorithm fits gene expression in each cluster  $k$  by a multivariate negative binomial distribution with cluster-specific mean  $\mu_k$ . The mean expression levels of only a small subset of genes are allowed to vary between clusters (150 for the current analysis; **Figure S3**); these genes are selected automatically by the algorithm by maximum likelihood methods. The use of such “sparse” methods is essential for probabilistic classification of high dimensional data (Bouveyron and Brunet-Saumard, 2014), and the genes selected represent those most informative for cluster differentiation. The number of clusters was chosen automatically using the Bayesian Information Criterion (BIC) (Schwarz, 1978). The ProMMT algorithm also provides a natural measure of the distinctness of each cluster, which we term the *isolation metric* (see Methods).

The ProMMT algorithm divided CA1 interneurons into 49 clusters (**Figure 1**). We named the clusters using a multilevel scheme, after genes that are strongly expressed at different hierarchical levels; for example, the cluster *Calb2.Vip.Nos1* belongs to a first level group characterized

by strong expression of *Calb2* (indicating interneuron selective interneurons); a second level group *Calb2.Vip*; and a third level group distinguished from other *Calb2.Vip* cells by stronger expression of *Nos1*. This naming scheme was based on the results of hierarchical cluster analysis of cluster means, using a distance metric based on the negative binomial model (Methods; **Figure 1**).

### Data Visualization

To visualize cell classes in two dimensions, we modified the t-stochastic neighbor embedding algorithm (Maaten and Hinton, 2008) for data with negative binomial variability, terming this approach nbtSNE. In conventional tSNE, the similarity between data points is defined by their Euclidean distance, which corresponds to conditional probabilities under a Gaussian distribution. We obtained greater separation of clusters and a closer correspondence to known cell types, by replacing the Gaussian distribution with the same negative binomial distribution used in our clustering algorithm (see Methods; **Figure S4**).

## CA1 inhibitory neurons

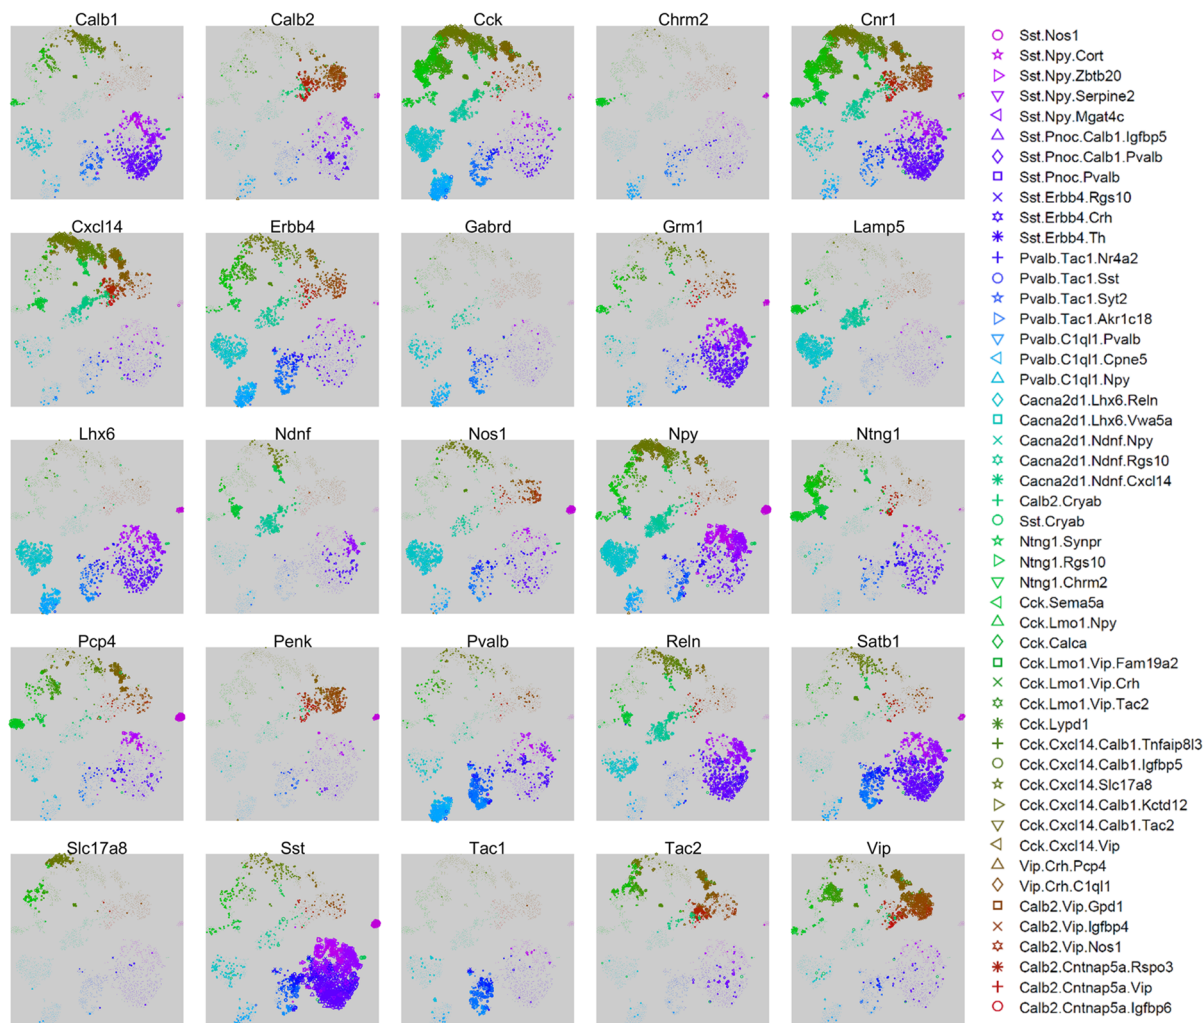

**Figure 3.** Expression levels of 25 selected genes, that together allow identification of major cell classes. Each subplot shows an nbtSNE map of all cells, with marker size indicating log-expression level of the gene named above the plot.

The nbtSNE maps revealed that cells were arranged in 10 major “continents” (Figure 2). The way expression of a single gene differed between classes could be conveniently visualized on these maps by adjusting the symbol size for each cell according to that gene’s expression level. Thanks to the extensive literature on CA1 interneurons, 25 genes together sufficed to identify the main continents with known cell classes (Figure 3), and it was also possible to identify nearly all the finer subclasses using additional genes specific to each class (Supplementary Text).

### Identification of cell types

Explaining how we identified these transcriptomic clusters with known cell types requires an extensive discussion of the previous literature, which is presented in full in the Supplementary Text. Here, we briefly

summarize the major subtypes identified (summarized in Figure 4).

Continent 1 was identified with the *Sst* positive hippocamposeptal and O-LM cells of *stratum oriens* (*so*). These cells all expressed *Sst* and *Grm1*, and were further divided into two *Npy*+/*Ngf*+ clusters identified as hippocamposeptal neurons (Acsády et al., 2000), and three *Pnoc*+/*Reln*+/*Npy*- clusters identified with O-LM cells (Katona et al., 2014). In addition, Continent 1 contains a previously undescribed subclass positive for *Sst*, *Npy*, and *Reln*.

Continent 2 was identified as basket and bistratified cells. These were all positive for *Tac1* (the precursor to the neuropeptide Substance P), as well as *Satb1* and *Erbb4*, but were negative for *Grm1*. They were divided into two *Pvalb*+/*Sst*- clusters identified with basket cells, two

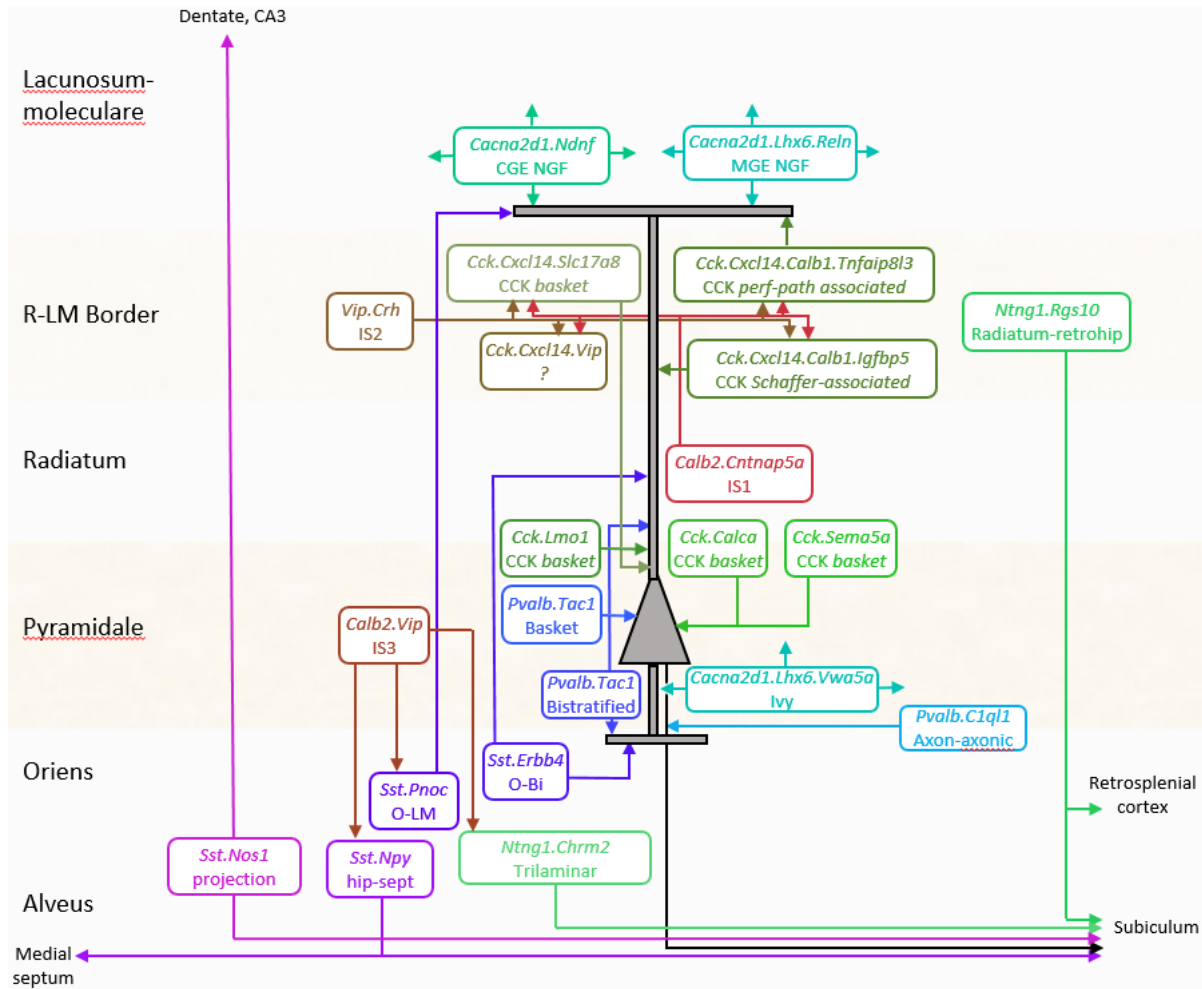

**Figure 4:** Inferred circuit diagram of identified GABAergic cell types. The identification of transcriptomic clusters with known cell classes is described in full in the supplementary material. Laminal locations and connections between each class are derived from previous literature.

*Pvalb+/Sst+/Npy+* clusters identified with bistratified cells (Klausberger et al., 2004), and three *Pvalb-* clusters identified with Oriens-Bistratified (o-Bi) cells (Losonczy et al., 2002).

Continent 3 was identified as axo-axonic cells, due to their expression of *Pvalb* but not *Satb1* (Viney et al., 2013). This continent's three clusters were *Tac1*-negative but positive for other markers including *Snca*, *Pthlh* and *C1ql1*, which have also been associated with axo-axonic cells in isocortex (Tasic et al., 2016). We note that this dichotomy of *Pvalb* interneurons into *Tac1* positive and negative subclasses is likely homologous to previous observations in isocortex (Vruwink et al., 2001).

Continent 4 was identified as Ivy cells and MGE-derived neurogliaform cells. These cells expressed *Cacna2d1*, which we propose as a unique identifier of hippocampal neurogliaform/ivy cells, as well as *Lhx6* and *Nos1*

(Tricoire et al., 2010). They were divided into a *Reln+* cluster identified with MGE-derived neurogliaform cells, and a *Reln-/Vwa5a+* cluster identified with Ivy cells (Fuentelba et al., 2008b). This continent is homologous to the isocortical *Igtp* class defined by Tasic et al (2016), which we hypothesize may represent isocortical neurogliaform cells of MGE origin; this hypothesis could be confirmed using fate-mapping.

Continent 5 was identified as CGE-derived neurogliaform cells. Its three clusters contained *Cacna2d1* and many other genes in common with those of continent 4, but lacked *Lhx6* and *Nos1* (Tricoire et al., 2010). Similar to isocortical putative neurogliaform cells, this continent expressed *Ndnf* and contained a distinct subtype positive for *Cxcl14* (Tasic et al., 2016). As with continent 4, continent 5 mainly expressed *Reln* but also contained a small *Reln*-negative cluster, which we suggest forms a rare and novel class of CGE-derived ivy cell.

Continent 6 was identified with *Sst*-negative long-range projection interneurons. It divided into two distinct clusters, both of which were strongly positive for *Ntng1*. The first strongly expressed *Chrm2* but lacked *Sst* and *Pvalb*, identifying them as trilaminar cells (Ferraguti et al., 2005; Jinno et al., 2007). The second subgroup lacked most classical molecular markers; this fact, together with their inferred laminar location at the *sr/slm* border, identified them as putative radiatum-retrohippocampal neurons that project to retrosplenial cortex (Jinno et al., 2007; Miyashita and Rockland, 2007).

Continents 7 and 8 were identified as what are traditionally called *Cck* interneurons. This term is somewhat unfortunate: while these cells indeed strongly express *Cck*, many other inhibitory classes express *Cck* at lower levels, including even *Pvalb*+ basket cells (Tricoire et al., 2011). Continents 7 and 8 cells comprised thirteen highly diverse clusters, but shared strong expression of *Cnr1*, *Sncg*, *Trp53i11* and several other novel genes. Continent 8 is distinguished by expression of *Cxcl14*, which localizes these cells to the border of *stratum radiatum* and *stratum lacunosum-moleculare* (*sr/slm*). This continent comprised a continuum ranging from somatargeting basket cells identified by their *Slc17a8* (vGlut3) expression, to dendrite targeting cells identified by expression of *Calb1* or *Reln* (Klausberger et al., 2005; Somogyi et al., 2004). Continent 7, lacking *Cxcl14*, was identified as *Cck* cells of other layers, and contained multiple subtypes characterized by the familiar markers *Calb1*, *Vip*, *Slc17a8* (Somogyi et al., 2004), as well novel markers such as *Sema5a* and *Calca*. Associated with continent 8 were several apparently novel subtypes: a rare and distinct group positive for both *Slc17a8* and *Calb1* and marked nearly exclusively by *Lypd1*; a *Ntng1*+/*Ndnf*+ subgroup related to cells of continent 6; and a group strongly expressing both *Vip* and *Cxcl14*, which therefore likely corresponds to a novel *Vip*+/*Cck*+ interneuron at the *sr/slm* border.

Continent 9 was identified as interneuron-selective interneurons. Its eight clusters fell into three groups: *Calb2*+/*Vip*- neurons identified as IS-1 cells; *Calb2*-/*Vip*+ neurons identified as IS-2 cells; and *Calb2*+/*Vip*+ neurons identified as IS-3 cells (Acsady et al., 1996a; Freund and Buzsáki, 1996; Gulyás et al., 1996; Tyan et al., 2014). All expressed *Penk* (Blasco-Ibanez et al., 1998). These cells contained at least two novel subgroups: an IS-3 subtype positive for *Nos1* and *Myl1*, homologous to the *Vip Mybpc2* class defined in isocortex (Tasic et al., 2016); and a rare subclass of IS-1 cell positive for *Igfbp6*.

Continent 10 contained a single highly distinct cluster located in an “island” off continent 1. In contained cells

strongly positive for *Sst* and *Nos1* (Jinno and Kosaka, 2004), whose expression pattern matches those of both backprojection cells (Sik et al., 1994) and PENK-positive projection cells (Fuentealba et al., 2008a), suggesting that these three previously-identified classes reflect a single cell type.

### Continuous variation between and within cell classes

Although the major continents of the expression map were clearly separated, clusters within these continents often appeared to blend into each other continuously. This indicates continuous gradation in gene expression patterns: while our probabilistic mixture model will group cells from a common negative binomial distribution into a single cluster, it will tile cells of continuously graded mean expression into multiple clusters.

These continua reflect both positive and negative correlations between genes. For example, in *Pvalb*-positive putative basket and bistratified cells, multiple genes associated with fast-spiking phenotype (such as *Kcnc1*, *Kcna1*, and *Pvalb*) were positively correlated with expression of the Na<sup>+</sup>/K<sup>+</sup> pump *Atp1b1*, but negatively correlated with expression the ATP1B1 modulator *Fxyd6* (mutations in which have been associated with schizophrenia; Choudhury et al., 2007). This correlated variability was evident both between subtypes of *Pvalb* neurons, and between different individual cells within *Pvalb* classes (Figure 5A). We conclude that *Pvalb*-positive interneurons exhibit continuous correlated variation in the expression of multiple genes; that the mean expression in different *Pvalb* subclasses lies at different locations along this continuum; but that variability also exists within the cells of a single subclass.

Patterns of correlated variability were similar across multiple interneuronal classes, in a manner consistent with their known spiking phenotypes. (Figure 5A,B). For example, most CCK interneurons show a regular-spiking phenotype, but a minority of fast-spiking CCK interneurons have also been reported (Cope et al., 2002; Pawelzik et al., 2002). Consistent with this, we found that expression of fast-spiking associated genes such as *Kcnc1* was on average lower in clusters corresponding to *Cck* interneurons, but that some cells still expressed these genes. Expression of *Kcnc1* showed similar correlations with *Atp1b1* and *Fxyd6* within *Cck* interneurons as within *Pvalb*-positive neurons (Figure 5B). We suggest that the preserved correlations between these example genes reflect a common program of gene regulation between

CA1 inhibitory neurons

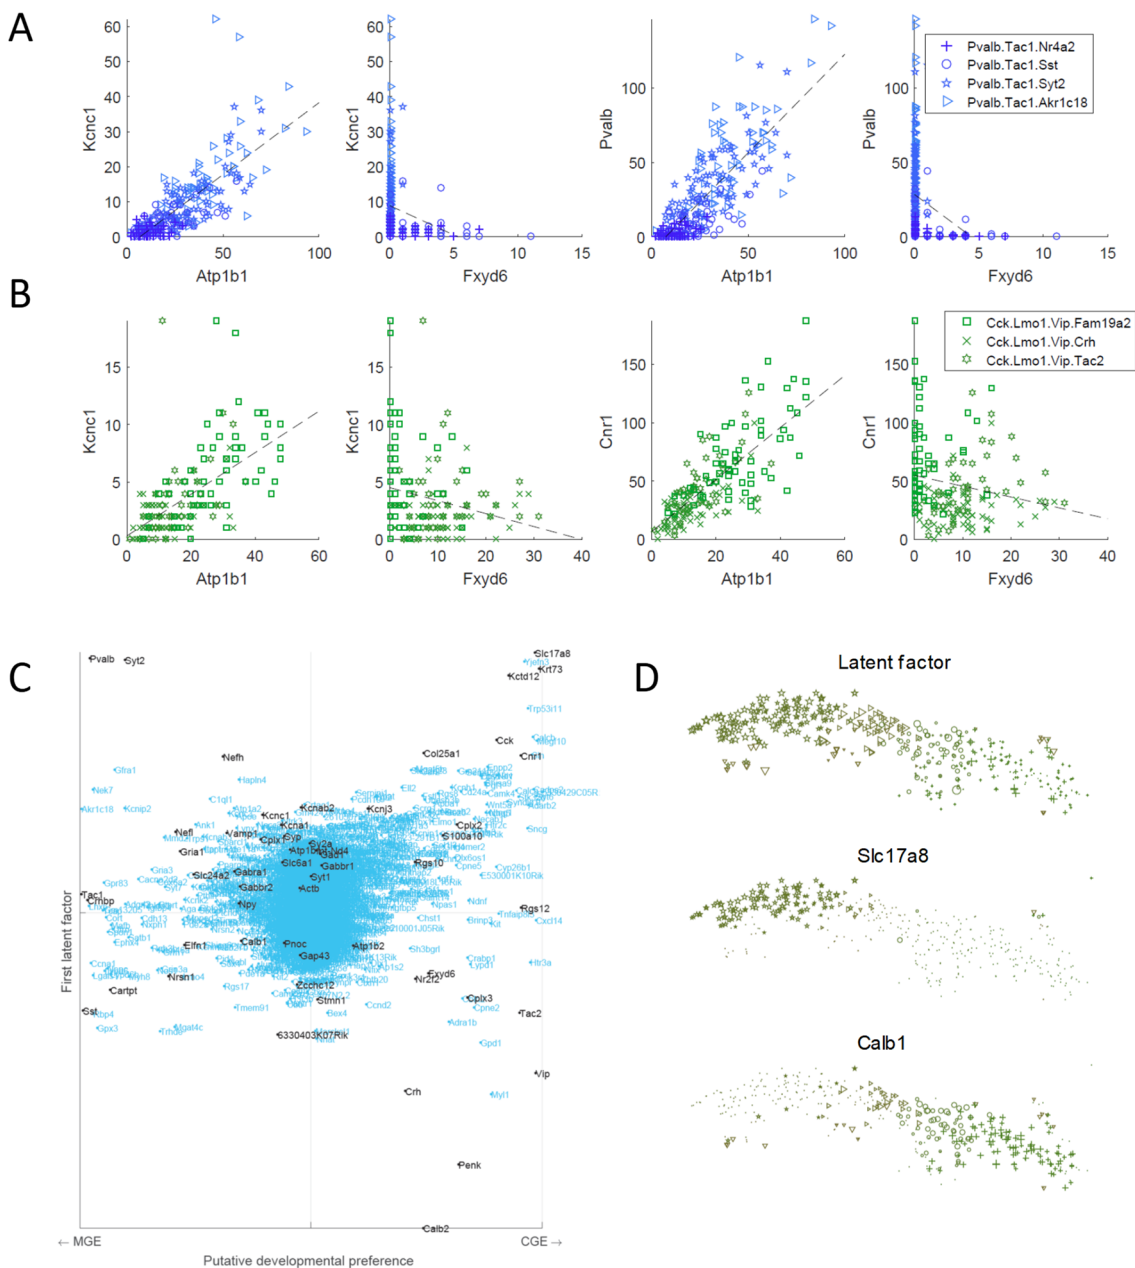

**Figure 5.** Continuous variation of expression between and within cell classes. **A**, In *Pvalb*-positive neurons, genes associated with fast-spiking phenotype (e.g. *Kcnc1* and *Pvalb*) are positively correlated with the Na<sup>+</sup>/K<sup>+</sup> pump *Atp1b1* but negatively correlated with its modulator *Fxyd6*. **B**, In *Cck/Vip*-positive neurons, expression of *Kcnc1* is lower than in *Pvalb* neurons, but correlations with *Atp1b1* and *Fxyd6* persist. *Pvalb* is not expressed in these neurons, but a similar correlation is observed for *Cnr1*. **C**, Latent factor analysis reveals a common mode of variation across cell types. Y-axis shows weighting of each gene onto the latent factor; x-axis shows relative expression of gene in MGE- and CGE-derived cell classes. Genes associated with fast-spiking phenotype, GABA synthesis, metabolism, excitatory and inhibitory inputs, and vesicle release are positively weighted on the latent factor. Black text highlights selected genes of particular interest. **D**, In *Cck* interneurons, the latent factor correlates with what part of pyramidal cells they target. Top: zoom of nbtSNE map for region of continent 8 identified with *Cck* interneurons at the *sr/slm* border, with symbol size representing value of hidden factor. Middle: symbol size represents expression of *Slc17a8*, a marker of soma-targeting *Cck* cells. Bottom: symbol size represents expression of *Calb1*, a marker of dendrite-targeting *Cck* cells.

these cells, specifically reflecting altered ion exchange requirements in faster-spiking neurons.

In addition to these commonalities, however, there were differences in genetic correlations across cell types. Mostly, these differences reflected which genes are expressed by which classes. For example, because *Pvalb* is



not expressed in *Cck* interneurons, it cannot exhibit a correlation with *Atp1b1* in this class; however, other genes expressed in *Cck* but not *Pvalb* interneurons (such as the cannabinoid receptor *Cnr1*) showed similar patterns of correlation (**Figure 5B**). Nevertheless, the patterns of correlation in continent 9 (identified with I-S cells) were largely unrelated to those of previous cell groups, even when the same genes were expressed. For example, *Fxyd6* and *Atp1b1* were positively correlated in this group (not shown).

To characterize this common mode of continuous variability across cell classes beyond these examples, we developed a probabilistic latent factor model (Methods). In this model, gene expression vectors follow a negative binomial distribution whose mean depends on a single latent factor (i.e. a hidden variable), with a gene-specific weight. We applied this latent factor model to the entire dataset, and studied the weighting of genes with known function to infer the biological significance of the continuum (**Figure 5C**). Genes associated with fast-spiking phenotype (e.g. *Kcnc1*, *Kcna1*, *Pvalb*) had positive weights, as did mitochondrial genes; genes associated with ion exchange and metabolism (e.g. *Atp1b1*; *Slc24a2*); genes associated with GABA synthesis, transport, and vesicular release (e.g. *Gad1*, *Slc6a1*, *Syp*, *Sv2a*, *Cplx2*, *Vamp1*); and genes associated with fast ionotropic glutamate and GABA receptors (e.g. *Gria1*, *Gabra1*), as well as GABA<sub>B</sub> receptors (e.g. *Gabbr1*, *Gabbr2*, *Kcnj3*, *Kctd12*). The genes correlating negatively with the latent factor were less familiar, but included *Atp1b2*, a second isoform of the Na<sup>+</sup>/K<sup>+</sup> pump; *Fxyd6*, which modulates its activity; *Nrsn1*, whose translation is suppressed after learning (Cho et al., 2015), as well as most neuropeptides (e.g. *Sst*, *Vip*, *Cartpt*, *Tac2*, *Penk*, *Crh*; exceptional neuropeptides such as *Cck* showed positive correlation). Genes associated with neurofilaments and intermediate filaments (e.g. *Nefh*, *Nefl*, *Krt73*) tended to show positive weights, while genes associated with actin processing (e.g. *Gap43*, *Stmn1*, *Tmsb10*) tended to show negative weights. Many other genes of as yet unknown function correlated positively and negatively with this latent factor (for example *6330403K07Rik*, which showed strong negative correlations).

We therefore hypothesize that cells with large values of the latent factor have a fast-spiking firing pattern; possess more synaptic vesicles and release larger amounts of GABA; receive stronger excitatory and inhibitory inputs; and exhibit faster metabolism. These are all characteristics of *Pvalb*-expressing fast-spiking interneurons (Hu et al., 2014), but a similar continuum was observed also within *Pvalb*-negative neurons.

The latent factor also differed between cells inhibiting the soma and dendrites of pyramidal cells. For example, consider the *Cck.Cxcl14* cells of continent 8 (**Figure 5D**), identified with *Cck*-positive neurons at the *sr/slm* border. Immunohistochemistry has demonstrated that in these cells, gene expression correlates with axon target: SLC17A8-positive basket cells project to the pyramidal layer (Somogyi et al., 2004), while CALB1 is expressed in neurons targeting pyramidal cell dendrites (Cope et al., 2002; Gulyás and Freund, 1996; Klausberger and Somogyi, 2008). Furthermore, *in vitro* recordings indicate that *Cck* interneurons targeting pyramidal somata have a faster-spiking phenotype: lower input resistance, narrower spikes, and less adaptation than those targeting pyramidal dendrites (Cope et al., 2002). The latent factor was higher in soma-targeting neurons: it was high to the west of continent 8, where *Slc17a8* is expressed, but lower in the east where *Calb1* is expressed (**Figure 5D**). Consistent with this result, the cannabinoid receptor *Cnr1*, which is more strongly expressed in soma-targeting neurons (Dudok et al., 2015; Lee et al., 2010) was more strongly expressed in the west. This therefore indicates a gradation from faster-spiking soma-targeting cells in the west of continent 8, to more regular-spiking dendrite-targeting cells in the east. Similar behavior was seen for many other cell classes. For example, *Sst.Pnoc* cells, identified with distal-targeting O-LM cells had lower latent factor values than *Pvalb.Tac1* cells identified with proximal-targeting basket and bistratified cells. The smallest latent factor values belonged to the *Calb2* cluster, identified with interneuron-specific interneurons.

In summary, we suggest that most interneuron classes exhibit a common continuum of gene expression patterns, that ranges from expression patterns typical of soma-targeting neurons that fire faster, synthesize and release more GABA, to slower-firing dendrite-targeting or interneuron-specific neurons whose action might rely more heavily on neuropeptides. Similar variability was seen within cells of a single type, with the exception of interneuron-selective cells, whose patterns of continuous variation differ to those of other classes.

### Patch-seq analysis confirms that genetic continuum correlates with fast-spiking phenotype

To test the hypothesis that the latent factor correlates with a neuron's electrophysiological firing pattern, we turned to Patch-seq analysis (Cadwell et al., 2016; Fuzik et al., 2016). We recorded from 25 hippocampal interneurons of area CA1 of *Pvalb-Cre;R26R-TdTomato* mice using *in vitro* whole-cell patch-clamp, and measured a set of standard parameters using square current steps. Principal component analysis of these parameters (**Figure 6A**)

revealed a dominant mode of variability (PC1) corresponding to variations in the strength of fast-spiking phenotype, characterized by narrow spikes, fast membrane time constant, low adaptation and rheobase, and rapid firing, sometimes with delayed onset (Hu et al., 2014). We sequenced mRNA from the patch pipette using previously described methods (Fuzik et al., 2016) setting a quality threshold of >10,000 reads/cell, which was obtained in 11 of these neurons.

To test the hypothesis, we computed the latent factor value for each patched neuron, using the gene weights obtained from the full scRNA-seq database (Figure 5C). Confirming the hypothesis that neurons of high latent factor values have faster-spiking phenotypes, we found that latent factor values were strongly correlated with the first principal component obtained from electrophysiological measurements (Spearman rank correlation,  $r=0.79$ ;  $p=0.006$ ). Analysis of the relationship between this genetic latent factor and individual firing properties (Figure S5) confirmed that cells with high latent factor values were more likely to exhibit fast-spiking and delayed-spiking phenotypes.

### Genetic continuum partially matches that predicted from activity-regulated gene expression

Gene expression depends not only on differences between cell types, but can also be dynamically modulated by factors such as by activity levels (Cohen et al., 2016; Dehorter et al., 2015; Donato et al., 2013; Mardinly et al., 2016; Spiegel et al., 2014). To test whether the continuum of gene expression revealed by our latent factor analysis was similar to that expected from activity-dependence, we correlated each gene's latent factor score with that gene's modulation by *in vivo* light exposure after dark housing, using data from 3 classes of visual cortical interneurons (made available by Mardinly et al., 2016). We observed a relatively strong positive correlation in *Sst* neurons ( $r=.26$ ;  $p<10^{-12}$ ; Figure S6), suggesting that at least activity dependent modulation of *Sst* cells may cause them to move along this same continuum. A weaker but still significant correlation was observed for *Pvalb* neurons ( $r=0.11$ ;  $p<0.002$ ), whereas no significant relationship was found for *Vip* neurons ( $p=0.17$ ). These data therefore suggest that at least some of the continuous variability of gene expression observed in CA1 interneurons may arise from activity-dependent modulation, but that activity-dependent modulation in *Vip* cells does not match the common continuum seen in other cell types. This latter suggestion is consistent both with the different correlation patterns seen within continent 9 of our CA1 database, and with the exceptional patterns of activity-

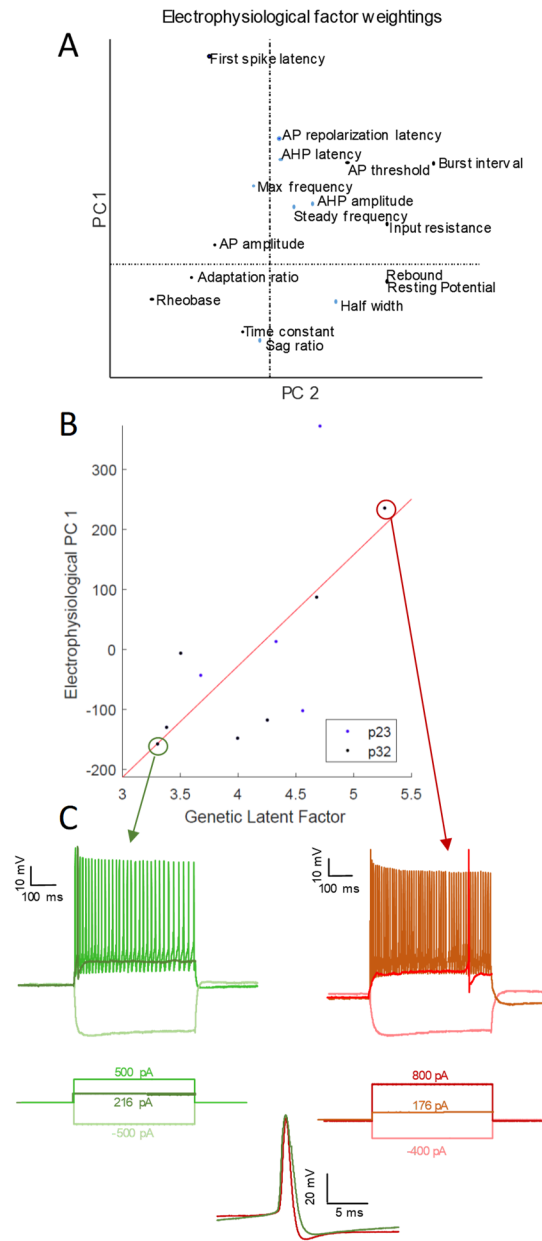

**Figure 6.** Genetic latent factor correlates with fast-spiking phenotype. **A**, Principal component analysis was applied to electrophysiological characteristics of *Pvalb* interneurons recorded intracellularly *in vitro*. Examination of factor weightings indicated that cells with higher values of PC1 exhibited a faster-spiking phenotype: narrower spikes, higher peak firing rates, and at times delayed-spiking. **B**, RNA extracted from the patch pipette was sequenced and used to compute the latent factor defined in figure 5C for each cell, using weights defined from the full database. The genetic latent factor was positively correlated with the fast-spiking phenotype measured by PC1. Colors indicate donor mouse age. **C**, Example traces of two recorded neurons. Note the lesser adaptation and delayed-spiking phenotype of the cell with higher latent factor. Bottom: close-up of superimposed spike waveforms for these two cells; note the narrower spike waveform of the cell of high latent factor (red)

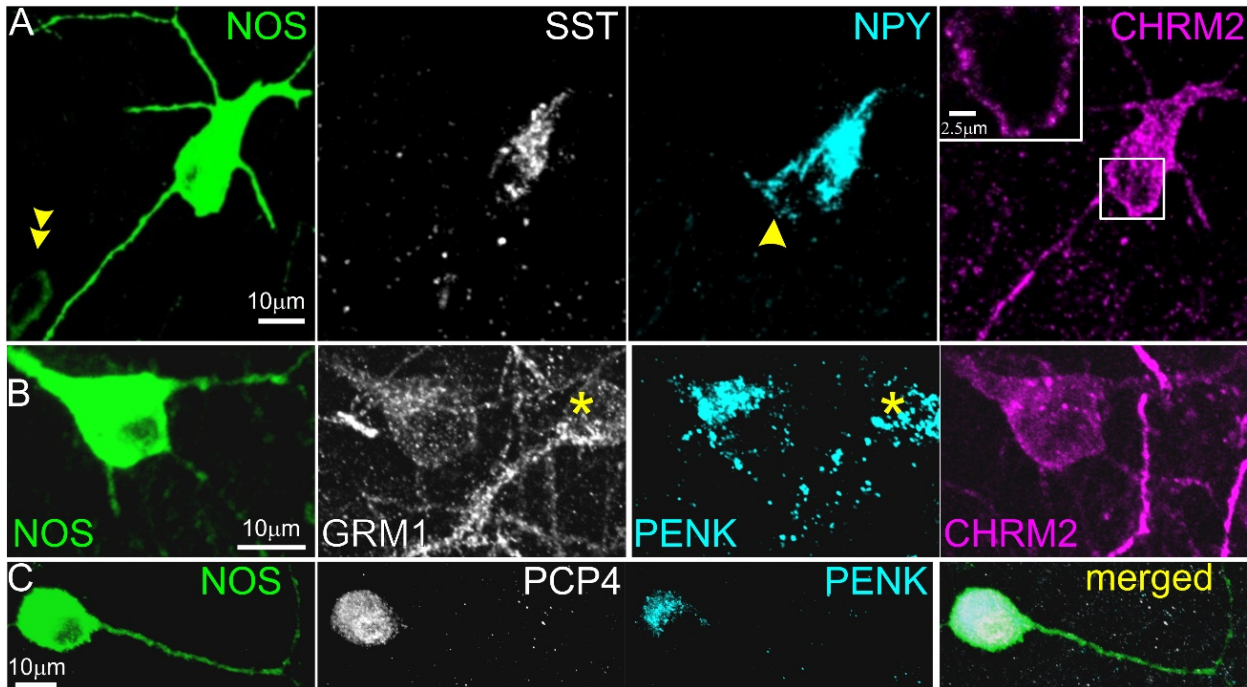

**Figure 7.** Immunohistochemical characterization of intensely NOS1-positive neurons. **A.** A large multipolar neuron in stratum pyramidale is strongly SST and NPY positive in the somatic Golgi apparatus and weakly positive for CHRM2 in the somato-dendritic plasma membrane (maximum intensity projection, z stack, height 11  $\mu\text{m}$ ; inset, maximum intensity projection of 3 optical slices, z stack height 2  $\mu\text{m}$ ). A smaller more weakly NOS1-positive cell (double arrow) in lower left is immunonegative for the other molecules; a second NPY positive cell (arrow) adjoining the NOS1+ neuron is immunonegative for the other three molecules. **B.** A NOS1-positive cell and another NOS1-immunonegative cell (asterisk) at the border of stratum radiatum and lacunosum-moleculare are both positive for GRM1 in the plasma membrane and PENK in the Golgi apparatus and in granules, but only the NOS1+ cell is immunopositive for CHRM2 (maximum intensity projection, z stack, height 10  $\mu\text{m}$ ). **C.** An intensely NOS1-positive cell in stratum radiatum is also positive for PCP4 in the cytoplasm and nucleus, and for PENK in the Golgi apparatus and in granules (maximum intensity projection, z stack, height 15  $\mu\text{m}$ ).

dependent gene modulation shown in *Vip* cells by Mardinly et al (2016).

### Histological confirmation of transcriptomic predictions

The transcriptomic classification we derived makes a large number of predictions for the combinatorial expression patterns of familiar and novel molecular markers in distinct CA1 interneuron types. To verify our transcriptomic classification, we set out to test some of these predictions using traditional methods of molecular histology.

Our first tests regarded the very distinct *Sst.Nos1* cluster of continent 10. This cluster's expression pattern matched three previously reported rare hippocampal inhibitory cell types: large SST-immunopositive cells that are intensely immunoreactive for NOS1 throughout the cytoplasm revealing their full dendrites (Jinno and Kosaka, 2004); PENK-positive projection cells (Fuentealba et al., 2008a); and strongly NADPH diaphorase-labelled (i.e. NOS1 positive) backprojection cells (Sik et al., 1994). We therefore hypothesized that these cell types, previously regarded as separate, may in

fact be identical. To test this hypothesis, we performed a series of triple and quadruple immunoreactions, focusing on the intensely NOS1-positive neurons ( $n=3$  mice,  $n=70$  cells: 39% in *so/alveus*; 10% in *sp*; 27% in *sr*; 24% at *sr/slm* border). Similar to previously reported PENK-projection, backprojection, and SST/NOS1 cells (Fuentealba et al., 2008a; Jinno and Kosaka, 2004; Sik et al., 1994) – but unlike SST-positive O-LM cells (Katona et al., 2014) – these neurons all showed aspiny or sparsely spiny dendrites. As expected from the *Sst.Nos1* cluster, we found that they were all SST/NPY double positive ( $n=20/20$ ) and were virtually all weakly positive for CHRM2 ( $n=36/38$ ) and GRM1 ( $n=17/17$ ) in the somato-dendritic plasma membrane, strongly positive for PCP4 ( $n=19/21$ ) in the cytoplasm and nucleus, and for PENK ( $n=35/42$ ) in the Golgi apparatus and granules in the soma and proximal dendrites (Figure 7). By contrast, the more numerous moderately NOS1 positive cells (which include many interneuron types such as ivy, MGE-neurogliaform and a subset of IS-3 neurons) were mostly immunonegative for CHRM2, PCP4 and PENK, although some were positive for GRM1. Our results are therefore consistent with the

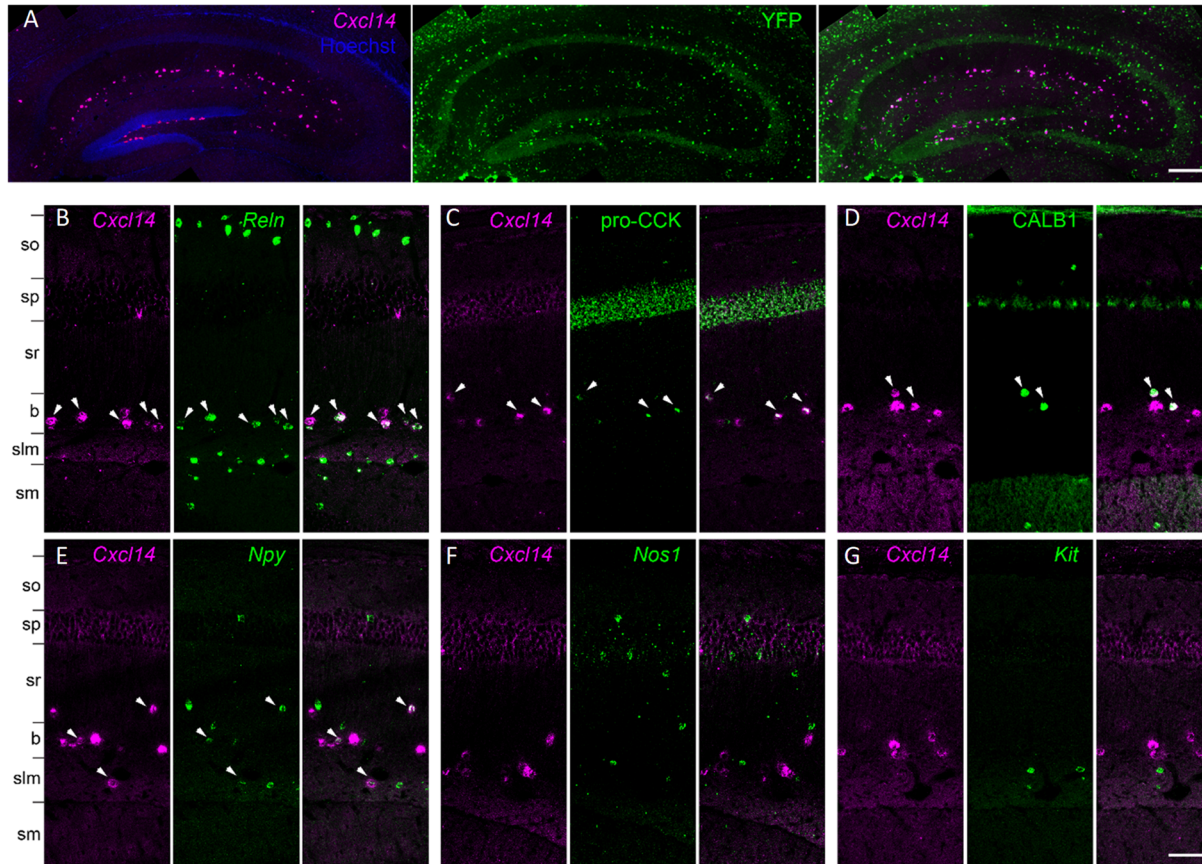

**Figure 8.** Analysis of *Cxcl14* co-expression patterns confirms predicted properties *Cck.Cxcl14* cells. **A**, *Cxcl14*-expressing cells are CGE-derived: in situ hybridization for *Cxcl14* combined with immunohistochemistry for YFP in the *Lhx6-Cre/R26R-YFP* mouse yields no double labelling. **B**, Double *in situ* hybridization for *Cxcl14* and *Reln* marks a population of neurons located primarily at the *sr/slm* border. Note *Reln* expression without *Cxcl14* in *so* and *slm*, likely reflecting O-LM and neurogliaform cells. **C-E**, Subsets of the *Cxcl14*-positive neurons are positive for pro-CCK or CALB1 (*in situ* hybridization plus immunohistochemistry), or *Npy* (double *in situ* hybridization). (**f, g**) No overlap was seen of *Cxcl14* with *Nos1* or *Kit*. In all panels, arrowheads indicate double-expressing neurons. Layer abbreviations: so, *stratum oriens*; sp, *stratum pyramidale*; sr, *stratum radiatum*; b, *sr/slm* border region; slm, *stratum lacunosum-moleculare*; sm, *stratum moleculare* of the dentate gyrus. Scale bars: 200  $\mu$ m (a), 100  $\mu$ m (b-g).

hypothesis that all three previously reported classes correspond to the *Sst1.Nos1* cluster.

A second prediction of our classification was the expression of *Npy* in multiple subclasses of *Cck* cell, most notably the *Slc17a8* and *Calb1* expressing clusters of continent 8. This was unexpected, as NPY (at least at the protein level) has instead been traditionally associated with SST-expressing neurons and ivy/neurogliaform cells (Fuentelba et al., 2008a, Katona et al., 2014). Nevertheless, no studies to our knowledge have yet examined immunohistochemically whether the neuropeptides NPY and CCK can be colocalised in the same interneurons. We therefore tested this by double immunohistochemistry in *sr* and *slm* (Figure S7A,B, n=3 mice). Consistent with our predictions, 119 out of 162 (74 $\pm$ 6%) of the cells immunopositive for pro-CCK were also positive for NPY (an additional 73 cells were positive for NPY only, which according to our identifications

should represent neurogliaform and radiatum-retrohippocampal cells). A subset (176 cells) of NPY and/or pro-CCK immunopositive neurons were further tested for CALB1 in triple immunoreactions. As expected, nearly all CALB1-positive neurons were pro-CCK-positive (89 $\pm$ 2%), and CALB1 immunoreactivity was seen in a subset of the cells containing both pro-CCK and NPY (27 $\pm$ 3%). Additional triple immunohistochemistry for NPY, pro-CCK and SLC17A8 (VGLUT3) revealed triple positive cells in *sr* and particularly at the *sr/slm* border, as predicted by the class *Cck.Cxcl14.Slc17a8* (Figure S7B). Due to the low level of somatic immunoreactivity for SLC17A8 (which as a vesicular transporter is primarily trafficked to axon terminals), we could not count these cells reliably; however of the cells that were unambiguously immunopositive for SLC17A8, in a majority we detected NPY. Additional analysis combining double *in situ* hybridization for *Slc17a8* and

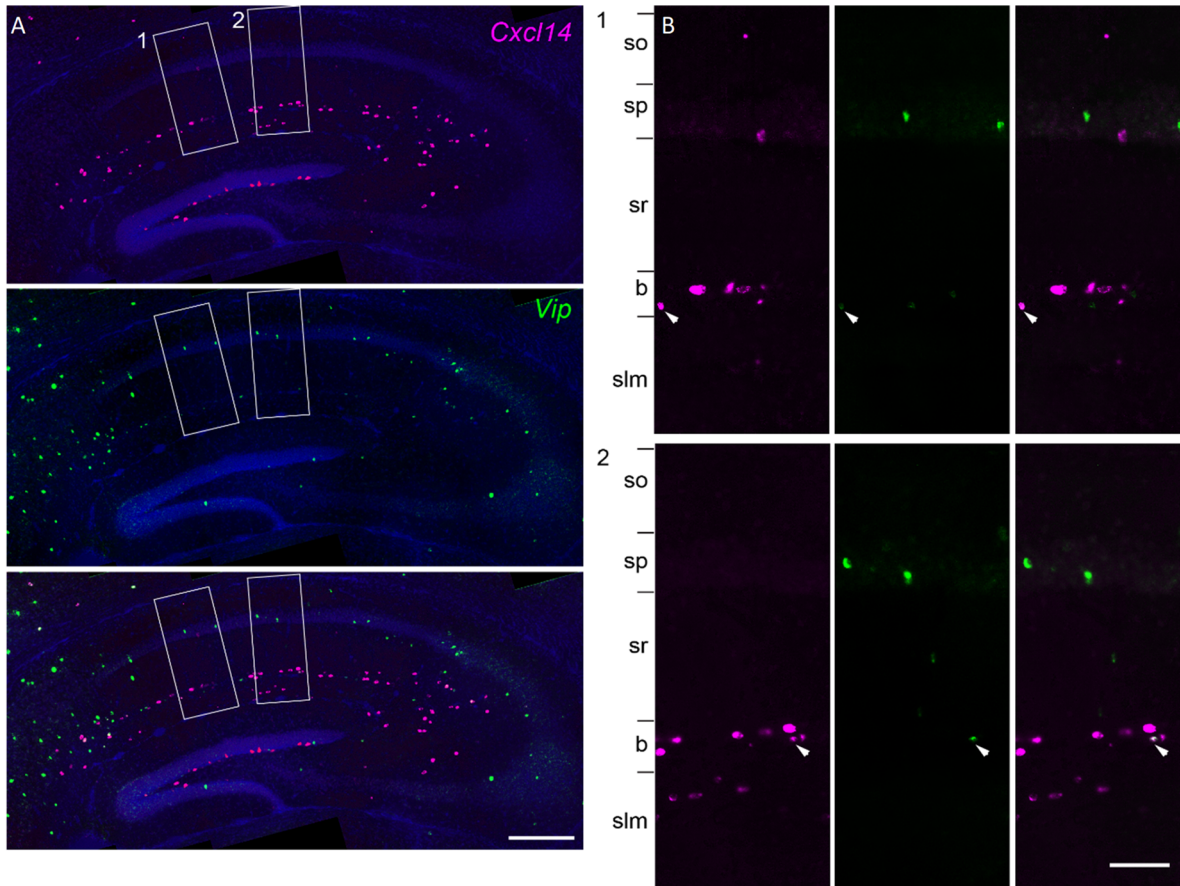

**Figure 9.** Overlap of *Cxcl14* and *Vip*. The class *Cck.Cxcl14.Vip* represented a puzzle: *Vip/Cck* cells had previously been reported in *sp*, but *Cxcl14* is detected primarily at the *sr/slm* border, although exceptional cells can be detected in *sp* also. **A**, double fluorescent *in situ* hybridization images reveal that the vast majority of cells co-expressing *Cxcl14* and *Vip* were found at the *sr/slm* border, confirming the location of this novel class. **B**, zoom into rectangles 1 and 2. Arrowheads: double-expressing cells.

*Npy* with immunohistochemistry for pro-CCK (**Figure S7B**,  $n=3$  mice) confirmed that the great majority of *Slc17a8*-expressing cells were also positive for *Npy* and pro-CCK ( $84\pm 3\%$ ). As predicted by our identifications, the converse was not true: a substantial population of *Npy*/pro-CCK double-positive cells ( $57\pm 7\%$  of the total) did not show detectable *Slc17a8*, which we identify with dendrite-targeting neurons in the east of continent 8.

Several cell types in our classification expressed *Cxcl14*, a gene whose expression pattern in the Allen Atlas shows localization largely at the *sr/slm* border. The *Cxcl14*-positive population includes all clusters of continent 8, which express *Cck* and contain subclusters expressing *Npy*, *Calb1*, *Reln*, and *Vip*; a subtype of CGE-derived neurogliaform cell that expresses *Reln* and *Npy* but lacks *Nos1* and expresses *Kit* at most weakly; as well as IS-1, IS-2, and radiatum-retrohippocampal cells. However, our classification predicts that the *Cxcl14*-positive population

should be distinct from all MGE-derived neurons, including MGE-derived neurogliaform cells.

To test these predictions, we performed *in situ* hybridization for *Cxcl14* simultaneously with *in situ* hybridization or immunohistochemistry to detect *Reln*, *Npy*, CALB1, CCK, PVALB, *Sst*, *Nos1* and *Kit* ( $n=3$  mice; **Figure 8**). In addition, we combined fluorescent *in situ* hybridization for *Cxcl14* with immunohistochemistry for YFP in *Lhx6-Cre/R26R-YFP* mice, which allows identification of developmental origin by marking MGE-derived interneurons (Fogarty et al., 2007). The results of these experiments were consistent with our hypotheses. We found that within CA1, *Cxcl14*-expressing cells were primarily located at the *sr/slm* border ( $71\pm 3\%$ ), although a subpopulation of cells were also found in other layers. We found no overlap of *Cxcl14* with YFP in the *Lhx6-Cre/R26R-YFP* mouse, confirming the CGE origin of *Cxcl14* expressing neurons (**Figure 8A**); consistent with this finding, no overlap was seen with *Cxcl14* and *Sst* or

*Pvalb* (data not shown). The majority of *Cxcl14*-positive cells expressed *Reln* (72±4%), accounting for 42±9% of *Reln*-expressing neurons (Substantial populations of *Reln*+/*Cxcl14*- cells located in *so* and *slm* likely represent O-LM and MGE-neurogliaform cells, respectively (**Figure 8B**). Indeed, although less than half of *Reln* cells were located at the R-LM border (44±1%), the great majority of *Reln*+/*Cxcl14*+ cells were found there (88±6%). Consistent with the expected properties of continent 8 cells, a large fraction of the *Cxcl14* population were immunoreactive for pro-CCK (62±6%; **Figure 8C**), while substantial minorities were positive for CALB1 (29±2%; **Figure 8D**) or *Npy* (25±5%; **Figure 8E**). However, as expected from the lack of *Cxcl14* in MGE-derived neurogliaform and IS-3 cells, we observed no overlap of *Cxcl14* with *Nos1* (0 out of 209 cells; **Figure 8F**); and very weak overlap with *Kit*, which is primarily expressed in clusters *Cacna2d1.Ndnf.Npy* and *Cacna2d1.Ndnf.Rgs10*, associated with the *Cxcl14*-negative CGE-neurogliaform population (1 of 264 cells respectively, from all mice; **Figure 8G**).

The cluster *Cck.Cxcl14.Vip* presented a puzzle, since *Cxcl14* is located primarily at the *sr/slm* border, whereas immunohistochemistry in rat has localized CCK/VIP basket cells to *sp* (Acsady et al., 1996a). Because *Cxcl14* expression can sometimes also be found in *sp*, we tested whether this cluster reflects *sp* cells, by combining in situ hybridization for *Cxcl14* with immunohistochemistry against VIP in mouse CA1 (**Figure 9**). This revealed frequent co-expression at the *sr/slm* border (8 ±1% *Cxcl14* cells positive for *Vip*; 23 ±1% *Vip* cells positive for *Cxcl14*), but very few *Cxcl14* cells in *sp*, and essentially no double labelling (1 of 147 *Vip* cells in *sp* was weakly labelled for *Cxcl14*). We therefore conclude that this cluster indeed represents a novel cell type located at the *sr/slm* border, expressing *Cck*, *Vip*, and *Cxcl14*.

## Discussion

The molecular architecture of CA1 interneurons has been intensively studied over the last decades, leading to the identification of 23 inhibitory classes. Our transcriptomic data showed a remarkable correspondence to this previous work, with all previously-described classes identified in our database. Our analysis also revealed a continuous mode of variability common across multiple cell types, eight hypothesized novel classes, as well as additional molecular subdivisions of previously described cell types.

Surprisingly, these data suggest that three previously described CA1 cell classes in fact represent a single cell type, a fact previously overlooked due to the limited combinations of molecules tested in prior work. The

*Sst.Nos1* class is strongly positive for *Nos1*, and also expresses *Sst*, *Npy*, *Chrm2*, *Pcp4* and *Penk*, but unlike *Penk*-positive interneuron-selective cells of continent 9 lacks *Vip*. This class is homologous to the Int1 and *Sst* Chodl classes defined in isocortex, which have been identified with long-range projecting sleep-active neurons (Gerashchenko et al., 2008; Magno et al., 2012; Tasic et al., 2016; Zeisel et al., 2015). The three previously described classes identified with *Sst.Nos1* are: PENK-immunopositive neurons with projections to subiculum, that were shown to be VIP-negative, but not tested for SST or NOS1 (Fumentalba et al., 2008b); the NADPH diaphorase-labelled (i.e. strongly NOS1 positive) axons reported by Sik et al (1994) as projecting to CA3 and dentate, but not labelled for SST or PENK; and the SST/NOS1 cells identified by Jinno and Kosaka (2004) in mouse were not tested for long-range projections or for PENK. While it remains possible that a larger transcriptomic sample of these rare neurons would reveal subclasses, our present data suggest that *Sst.Nos1* cells are a homogeneous population. We therefore suggest that they constitute a class of inhibitory neurons with diverse long-range projection targets. Interestingly, the targets of PENK-positive projection cells are most commonly PVALB-positive interneurons, unlike conventional IS cells, which preferentially target SST cells (Fumentalba et al., 2008a). As these cells are identified as sleep-active, this fact may provide an important clue to the mechanisms underlying sleep in cortical circuits.

The match between our transcriptomic analysis and previous immunohistochemical work (primarily in rat) is so close that it is simpler to describe the few areas of disagreement than the many areas of agreement. First, ACTN2 has been used as a neurogliaform marker in rat (Price et al., 2005), but was almost completely absent from any cell type of our database. We suggest this reflects a species difference, as previous attempts with multiple ACTN2 antibodies have been unsuccessful in mouse (JH-L, unpublished observations), and *Actn2* labelling is not detectable in the Allen atlas (Lein et al., 2007). Second, we observed *Calb2* in a subset of putative O-LM cells; these *Calb2*-expressing neurons typically also expressed *Calb1*. Such O-LM cells have not been described in rat (Katona et al., 2014), but CALB2/SST neurons have been observed in mouse isocortex (Tasic et al., 2016; Xu et al., 2006). A third inconsistency regards NCALD, which in rat was reported not to overlap with PVALB, SST, or NPY (Martínez-Guijarro et al., 1998), but did so in our data. Finally, it has previously been reported that a subset of O-LM cells show *Htr3a* expression (Chittajallu et al., 2013). In our data, we observed at most weak expression of *Htr3a* in *Sst* cells, and the cells showing it belonged to

clusters identified as hippocamposeptal rather than O-LM cells.

Our analysis revealed several rare and presumably novel cell groups, although we cannot exclude that some of these were inadvertently included from areas bordering CA1. *Sst.Npy.Serpine2* and *Sst.Npy.Mgat4c*, which simultaneously expressed *Sst*, *Npy*, and *Reln* fit the expected expression pattern of neither O-LM nor hippocamposeptal cells; *Sst.ErbB4.Rgs10* is a distinct group related to *Pvalb* basket and bistratified cells; *Cck.Lypd1* formed a rare and highly distinct class expressing *Cck*, *Slc17a8*, and *Calb1* that may be localized near the CA3 border; *Ntng1.Synpr* showed an expression pattern with features of both *sr/slm Cck* neurons and projection cells; and *Cck.Cxcl14.Vip* represents a cell class strongly positive for both *Cck* and *Vip* located at the *sr/slm* border that appears to represent a pyramidal- rather than interneuron-targeting class. The analysis also revealed subdivisions of known types, such as the division of IS-3 cells into *Nos1* positive and negative groups, and the division of CGE-NGF cells into *Car4*- and *Cxcl14*-expressing subtypes. Finally, our data suggested that with further data, even rarer types are likely to be found, such as a small group of cells with features of both basket and axo-axonic cells located off the coast of continent 3. Indeed, such cells have been encountered by quantitative electron microscopic analysis of synaptic targets in the rat (P. S., unpublished observations).

Latent factor analysis revealed a common continuum of gene expression across the database, with differences both between clusters, and within the cells of a single cluster. Many of the genes positively correlated with the latent factor are associated with fast-spiking phenotype, and this relationship was confirmed using patch-seq in *Pvalb* interneurons. Several other classes of genes were correlated with the latent factor including genes related to presynaptic function, GABA release, metabolism, or excitatory and inhibitory inputs (including GABA<sub>B</sub>). Clusters with high mean values of the factor were identified with interneuron types targeting pyramidal cell somas or proximal dendrites (such as *Pvalb* or *Cck/Slc17a8* expressing basket cells), while those with low mean values were identified with interneurons targeting pyramidal distal dendrites (such as *Sst* or *Cck/Calb1* expressing dendrite-targeting cells) or other interneurons. This correlation makes functional sense: because distal dendritic inputs will be subject to passive dendritic filtering, their vesicle release does not need to be so accurately timed, as reflected in lower expression of fast-timing genes such as *Kcnc1* (Hu et al., 2014). I-S cells had the lowest mean values of the latent factor, consistent with their small axonal trees and metabolic machinery

(Gulyás et al., 2006). The stronger expression of most neuropeptides in cells of low latent factor suggests that these slower, distal-targeting interneurons may also rely more heavily on neuropeptide signaling, for which slow firing rates support outputs transduced by slower G-protein coupled receptors.

The precise genes modulated by the latent factor varied between cell classes. For example, while *Pvalb* and *Cnr1* both correlated positively with the factor, they were expressed in different sets of neurons. The latent factor analysis suggested several genes as interesting candidates for future research, such as *Trp53i11*, *Yjefn3* and *Rgs10*, associated with faster spiking *Cck* cells; *Zcchc12* and *6330403K07Rik*, both associated with slower-firing cells of all classes; and *Fxyd6*, associated with slow-spiking, which may modulate ion exchange. Intriguingly, we found that genes for neurofilaments and other intermediate filaments were positively correlated with the latent factor, while genes involved in actin processing were negatively correlated; we speculate that this might reflect a different cytoskeletal organization required for somatic- and dendritic-targeting neurons.

In addition to differences in mean latent factor values between cell types, we also observed continuous gradation within cell types, along the same continuum. This may at least partially reflect activity-dependent modulation of gene expression. Indeed, analysis of the data of Mardinly et al (2016) showed that genes positively related to the latent factor were also more likely to be upregulated by light exposure in visual cortical interneurons. We therefore hypothesize that the latent factor represents a program of gene expression that differs between cell types (presumably due to early developmental factors), but can also be fine-tuned by activity dependence in adulthood, with higher levels of network activity leading to a homeostatic increase in expression of factor-related genes such as those relating to GABA release and interneuron metabolism. Interestingly, the pattern of continuous variation within continent 9 was different to other classes, perhaps indicating a different role for activity-dependent homeostasis in interneuron-selective cells.

The relatively simple cytoarchitecture of CA1 compared to other cortical regions suggests that the organization revealed by these data represent a “lower bound” on the level of complexity to that can exist in cortical circuits. For example, it is likely that isocortex has considerably more complex cell-type organization due to its lamination and arealization. An understanding of the multifarious classes of such cells is an essential step toward deciphering their function.

## Methods

### Single-cell RNA sequencing

#### *Animals*

*Slc32a1* (vesicular GABA transporter)-*Cre* BAC transgenic mice (Ogiwara et al., 2013) were crossed with a tdTomato reporter line to generate mice with fluorescently labelled inhibitory neurons. Both the *Slc32a1-Cre* and tdTomato mouse lines were of mixed B6 and CD1 backgrounds. Three of these mice were used for both the p28 and p63 cohorts; both males and females were used at each age. All experimental procedures followed the guidelines and recommendations of Swedish animal protection legislation and were approved by the local ethical committee for experiments on laboratory animals (Stockholms Norra Djurförsöksetiska nämnd, Sweden). The data are available on GEO under accession number GSE99888.

#### *Single cell suspension and FACS*

Dissection and single cell dissociation were carried out as described before (Marques et al. 2016), with slight alterations for P63 animals, where NMDG-HEPES based solution was used in all steps to enable better recovery of the aged cells (Tanaka, 2008). The NMDG-HEPES based cutting solution contained 93mM NMDG, 2.5mM KCl, 1.2mM NaH<sub>2</sub>PO<sub>4</sub>, 30mM NaHCO<sub>3</sub>, 20mM HEPES, 25mM Glucose, 5mM sodium ascorbate, 2mM thiourea, 3mM sodium pyruvate, 10mM MgSO<sub>4</sub>\*7H<sub>2</sub>O, 0.5mM CaCl<sub>2</sub>\*2H<sub>2</sub>O and 12mM N-acetyl-L-cysteine; it was adjusted to pH 7.4 with 10N HCl. Mice were sacrificed by an overdose of Isoflurane and Ketamine/Xylazine, followed by transcardial perfusion through the left ventricle with artificial cerebrospinal fluid (aCSF) equilibrated in 95%O<sub>2</sub> 5%CO<sub>2</sub> before use. The brain was removed and CA1 was microdissected from 300µm vibratome sections. Single-cell suspensions were prepared using Papain (Worthington) with 30min enzymatic digestion, followed by manual trituration with fire-polished Pasteur pipettes. The albumin density gradient was only performed for the p63 samples. On a BD FACSAria II, tdTomato-positive cells were sorted into oxygenated aCSF at 4°C, concentrated, inspected for viability, and counted.

#### *10X Chromium mRNA-seq*

Sorted suspensions were added to 10X Chromium RT mix aiming at 2500 cells recovered per experiment. Downstream cDNA synthesis (14 PCR cycles) and library preparation were carried out as instructed by the manufacturer (10X Genomics Chromium Single Cell Kit Version 1). Libraries were sequenced on the Illumina HiSeq2500 to an average depth 112 000 reads per cell (raw), yielding on average 3600 distinct molecules and

1700 genes per cell. Demultiplexed samples were aligned to the reference genome and converted to mRNA molecule counts using the “cellranger” pipeline version 1.1, provided by the manufacturer.

#### *Normalization*

Prior to many analyses (including clustering and 2d visualization) the expression vectors for each cell were normalized, so that each cell’s total RNA expression became equal to the total cellular RNA count averaged over all cells in the database.

#### *Quality control*

Cells showing abnormally high values of nuclear noncoding RNAs (*Meg3*, *Malat1*, *Snhg11*) or mitochondrial genes were discarded, as this can signify cell lysis. Cells were discarded if the summed normalized expression of these genes exceeded a threshold of 600.

### Immunohistochemistry (Oxford)

Six adult (20 weeks old) male C57BL/6J mice (Charles River, Oxford, UK) were perfusion fixed following anaesthesia and tissue preparation for immunofluorescence (Katona et al., 2014) and analysis using wide-field epifluorescence microscopy (Somogyi et al., 2004) were performed as described. The following primary antibodies were used: anti-calbindin (goat, Frontier Inst, Af104); anti-pro-CCK (rabbit, 1:2000, Somogyi et al., 2004); anti-metabotropic glutamate receptor 1a (GRM1, rabbit, 1:1000; guinea pig, 1:500; gifts from Prof. M. Watanabe, Frontier Institute); anti-muscarinic acetylcholine receptor 2 (CHRM2, rat, 1:400, EMD Millipore Corporation, MAB367); anti-NOS1 (rabbit, 1:1000, EMD Millipore Corporation, AB5380; mouse, 1:1000, Sigma-Aldrich, N2280); anti-NPY (mouse, 1:5000, Abcam, #ab112473); anti-Purkinje cell protein 4 (PCP4, rabbit, 1:500, Santa Cruz Biotechnology, sc-74816); anti-pre-pro-enkephalin (PENK, guinea pig, 1:1000, gift from Takahiro Furuta, Kyoto University, Japan; rabbit, 1:5000, LifeSpan Biosciences, LS-C23084); anti-SST (sheep, 1:500, Fitzgerald Industries International, CR2056SP); anti-VGLUT3 (guinea pig, Somogyi et al 2004). Secondary antibodies were raised in donkey against immunoglobulin G of the species of origin of the primary antibodies and conjugated to Violet 421 (1:250); DyLight405 (1:250); Alexa 488 (1:1000); cyanine 3 (1:400); Alexa 647 (1:250); cyanine 5 (Cy5, 1:250). With the exception of donkey-antimouse-Alexa488 purchased from Invitrogen, all secondary antibodies were purchased from Stratech.

For cell counting, image stacks (212 × 212 µm area; 512 × 512 pixels; z stack height on average 12 µm) were



acquired using LSM 710/AxiImager.Z1 (Carl Zeiss) laser scanning confocal microscope equipped with Plan-Apochromat 40x/1.3 Oil DIC M27 objective and controlled using ZEN (2008 v5.0 Black, Carl Zeiss). In a second set of sections, images were taken using Leitz DM RB (Leica) epifluorescence microscope equipped with PL Fluotar 40x/0.5 objective. Counting was performed either using ImageJ (v1.50b, Cell Counter plugin) on the confocal image stacks or OPENLAB software for the epifluorescence documentation. For the CCK counts, numbers were pooled from two separate reactions testing for a given combination of primary antibodies (n=3 mice each reaction, 2-3 sections each mouse) and reported as average values  $\pm$  standard deviation. For the testing of intensely nNOS-positive neurons cells were selected using Leitz DM RB (Leica) epifluorescence microscope equipped with PL Fluotar 40x/0.5 objective. Cells were pooled from three separate reactions testing for a given combination of primary antibodies (n=3 mice each reaction, 2 sections each mouse) and reported as pooled data. Image processing was performed using ZEN (2012 Blue, Carl Zeiss), ImageJ (v1.51m, open source), Inkscape (0.92, open source) and Photoshop (CS5, Adobe).

### **In situ hybridization (UCL)**

Wild type (C57BL/6/CBA) male and female adult (P30) mice and *Lhx6-Cre<sup>Ts</sup>* transgenic mice were perfusion-fixed as previously described (Rubin et al., 2010), followed by immersion fixation overnight in 4% paraformaldehyde. Fixed samples were cryoprotected by overnight immersion in 20% sucrose, embedded in optimal cutting temperature (OCT) compound (Tissue Tek, Raymond Lamb Ltd Medical Supplies, Eastbourne, UK) and frozen on dry ice. 30  $\mu$ m cryosections were collected in DEPC-treated PBS and double *in situ* hybridization was carried out as described (Rubin et al., 2010). Probes used included either a *Cxcl14*-(digoxigenin)DIG RNA probe in combination with *Reln*-(fluorescein)FITC, *Npy*-FITC or *Sst*-FITC or *Vip*-FITC probes, or a *Cxcl14*-FITC probe with *Nos1*-DIG, *Kit*-DIG, *Scl17a8*-DIG, or *Pvalb*-DIG probes. DIG-labelled probes were detected with an anti-DIG-alkaline phosphatase (AP)-conjugated antibody followed by application of a Fast Red (Sigma) substrate. The first reaction was stopped by washing 3 x 10 min in PBS, and the sections were incubated with an anti-FITC-Peroxidase (POD)-conjugated antibody (1:1500 - Roche) overnight. The POD signal was developed by incubating the sections with Tyramide-FITC:amplification buffer (1:100, TSA<sup>TM</sup>-Plus, Perkin Elmer) for 10 minutes, at room temperature. For immunohistochemistry after *in situ* hybridization the following antibodies were used: anti-Calbindin (rabbit, 1:1000, Swant, Bellinzona, Switzerland); anti-pro-CCK (rabbit, 1:2000, Somogyi et al., 2004); anti-GFP (chicken,

1:500, Aves Labs). All sections were counterstained with Hoechst 33258 dye (Sigma, 1000-fold dilution) and mounted with Dako Fluorescence Mounting Medium (DAKO).

For cell counts, images (at least two sections per mouse) were acquired on an epifluorescence microscope (Zeiss) with a 10x objective. Several images spanning the entire hippocampal CA1 were stitched using Microsoft Image Composite Editor. Cells were counted manually in the CA1 area including *sr* and *slm* and in a subregion spanning 100  $\mu$ m across the border between *sr* and *slm*, where most *Cxcl14*-positive cells are located. Confocal images (z stack height on average 25  $\mu$ m, 2  $\mu$ m spacing) were taken on a Leica confocal microscope under a 10x objective and processed for contrast and brightness enhancement with Photoshop (CS5, Adobe). A final composite was generated in Adobe Illustrator (CS5, Adobe).

### **Cluster analysis**

#### *Sparse Mixture Model*

Let  $\mathbf{x}$  represent the  $N_{genes}$ -dimensional vector summarizing the expression of all genes in a single cell. We model the probability distribution of  $\mathbf{x}$  with a mixture model:

$$\Pr(\mathbf{x}) = \sum_k \Pr(\mathbf{x}|k) \pi_k \quad (1)$$

Here,  $k$  denotes a cell class,  $p(\mathbf{x}|k)$  denotes the probability that a cell in this class will have expression vector  $\mathbf{x}$ , and the “class prior”  $\pi_k$  represents the fraction of cells belonging to this class. To model  $p(\mathbf{x}|k)$ , we use the following distribution family:

$$\Pr(\mathbf{x}|k) = \prod_g \begin{cases} \Pr(x_g|\mu_{g,0}) & g \notin S \\ \Pr(x_g|\mu_{g,k}) & g \in S \end{cases} \quad (2)$$

In this family, the distribution of all genes is modelled as conditionally independent within a class. The within-class distribution of each gene  $g$  depends on a single parameter  $\mu_{g,k}$  (the mean level of the gene in that class). Furthermore, the distributions of only a subset  $S$  of genes are allowed to vary between classes, while the remainder are constrained to have a class-independent distribution with mean  $\mu_{g,0}$ . Taking  $S$  to have a fixed and small size  $N_S$  ensures a “sparse model”, which can be fit robustly in high dimensions from only a small number of cells. Note that while the set  $S$  could in principle vary between classes, we have found that using a single set  $S$  for all classes provides good results.

### Negative binomial distribution

To model the variability of each gene within a class, we use a negative binomial distribution. The negative binomial distribution is a model of count data with greater variance than the Poisson distribution, and is frequently used as a model for gene expression levels (Lu et al., 2005; Robinson and Smyth, 2008). The negative binomial is specified by two parameters,  $r$  and  $p$ , and has distribution

$$\Pr(x; r, p) = \binom{x+r-1}{x} p^x (1-p)^r \quad (3)$$

This distribution has mean  $\mu = \frac{rp}{1-p}$ , and for fixed  $r$  the maximum likelihood estimate of parameter  $p$  is  $\frac{\mu}{r+\mu}$ , where  $\mu$  is the sample mean. For fixed  $r$  the standard deviation of this distribution scales asymptotically linearly with its mean:  $\sigma = \sqrt{\frac{\mu^2}{r} + \mu}$ . In contrast, the Poisson distribution has a smaller standard deviation, which scales with the square root of the mean.

We verified that a negative binomial with fixed  $r$  is appropriate for scRNA-seq data by considering a relatively homogeneous class (CA1 pyramidal cells; **Figure S2A**; data from Zeisel et al (2015)). This analysis confirmed that the negative binomial with  $r = 2$  accurately modelled the relationship of standard deviation to mean in this data. The “wide” shape of the negative binomial distribution (**Figure S2B**) has a consequence that the absolute expression levels of a gene matters much less than whether the gene is expressed at all. Indeed, examining the symmetrized Kullback-Leibler divergence of negative binomials with different means (**Figure S2C**) – an indication of the penalty paid for misestimating the mean expression level – indicates that a much smaller penalty is paid for fitting a mean of 500 to a distribution whose actual mean is 1000, than to fitting a mean of 10 to a distribution whose actual mean is 0.

### EM algorithm

To fit the model, we fix  $r = 2$ , and fit the parameters  $S$ ,  $\mu$ , and  $\pi$  by maximum likelihood. Because maximum likelihood fitting involves a sum over (unknown) class assignments, we use a standard Expectation-Maximization (EM) algorithm (Bishop, 2006; Dempster et al., 1977). We define  $z_{c,k}$  to be the expected value of an indicator variable taking the value 1 if cell  $c$  belongs to class  $k$ :

$$z_{c,k} = \Pr(k|\mathbf{x}_c; S, \mu).$$

The algorithm alternates between an E step, where  $z_{c,k}$  is computed using the current values of the parameters  $S$

and  $\mu$ , and an M step, where  $S$  and  $\mu$  are optimized according to the current values of  $z_{c,k}$ .

### E-step

The E step is straightforward. Observe that

$$\begin{aligned} \log \Pr(\mathbf{x}_c|k) &= \text{const} + \log(\pi_k) \\ &\quad + \sum_{g \in S} x_{c,g} \log(p_{g,k}) + r \log(1 - p_{g,k}) \end{aligned}$$

The constant term includes the contributions of all genes not in  $S$ , as well as the binomial coefficient from (3), none of which depend on the value of  $k$ , and therefore do not affect the result.

One can compute  $z_{c,k}$  from this using Bayes’ theorem; in practice, however we found that when the set  $S$  contains a reasonable number of genes ( $\sim 100$  or more) all values of  $z_{c,k}$  are close to 0 or 1, so there is little to lose by employing a much faster “hard EM” algorithm, in which for all cells  $c$  only a single winning  $k_c$  has  $z_{c,k_c} = 1$ , with all others 0.

### M-step

In the M-step, we are given  $z_{c,k}$  and must find the set  $S$  of genes that are allowed to differ between classes, and their class means  $\mu_{gk}$ , by maximum likelihood. Although one might expect finding  $S$  to pose an intractable combinatorial optimization problem, it can in fact be solved quickly and exactly. The derivation below is for a hard EM algorithm; the soft case can be derived easily, but requires substantially more computation time, without a noticeable increase in performance.

We first define a quantity  $L_0$  to be the log likelihood of the data under a model where  $S = \emptyset$ , so all the expression of each genes  $g$  is determined by its grand mean  $\mu_{g,0}$ , independent of cluster assignments. Observe that

$$L = L_0 + \sum_{g \in S} Y_g$$

where

$$\begin{aligned} Y_g &= \sum_c x_{g,c} [\log(p_{g,k_c}) - \log(p_{g,0})] \\ &\quad + r [\log(1 - p_{g,k_c}) - \log(1 - p_{g,0})] \end{aligned}$$

represents the gain in log likelihood obtained when the distribution of gene  $g$  is allowed to vary between classes. To compute the optimal value of the set  $S$ , we note that the values of  $Y_g$  are independent of each other. Thus, the optimal set  $S$  is simply the  $N_s$  genes with the largest values of  $Y_g$ .

The maximum likelihood estimates of the negative binomial parameters  $p_{g,k}$  are given by  $\frac{\mu_{g,k}}{r+\mu_{g,k}}$ , where  $\mu_{g,k}$  denotes the average expression of gene  $g$  for the cells currently assigned to cluster  $k$ , and  $\mu_{g,0}$  is the mean expression of gene  $g$  for all cells in the database. Because the negative binomial distribution can give zero likelihoods if any  $\mu_{g,k} = 0$ , we use a regularized mean estimate:

$$\mu_{g,k} = \frac{A + \sum_{c \in k} x_{g,c}}{B + N_k}$$

Where  $N_k$  denotes the number of cells in cluster  $k$ , and the regularization parameters take the values  $A = 10^{-4}$ ,  $B = 1$ .

Finally, we compute the priors  $\pi_k$  as the fraction of cells  $c$  with  $k_c = k$ , as is standard in EM.

#### BIC penalty

To automatically choose the number of clusters, we employed the BIC method (Schwarz, 1978), which for our model takes the form of a penalty  $\frac{|S| \log(N_c)}{2}$  per cluster added to the log likelihood.

#### Cluster splitting

As is typical for cluster analysis, the likelihood function has multiple local maxima, and steps must be taken to ensure the algorithm does not become trapped in a suboptimal position. To do this, we use a heuristic that splits clusters that are poorly fit by a negative binomial distribution. The full clustering method consists of a divisive approach that alternates such splits with EM runs that then re-optimize the parameters.

For each cluster  $k$ , the splitting heuristic searches for genes  $g$  whose likelihood would be substantially increased if the cluster was split in two, according to whether the expression of gene  $g$  is above a threshold  $\theta_g$ . Note that after splitting, the amount by which the log likelihood gain  $Y_g$  changes can be written as

$$\begin{aligned} \Delta Y_{g,\theta} = & \sum_{c: x_{g,c} < \theta} x_{g,c} [\log(p_g^<) - \log(p_g)] \\ & + r [\log(1 - p_g^<) - \log(1 - p_g)] \\ & + \sum_{c: x_{g,c} \geq \theta} x_{g,c} [\log(p_g^{\geq}) - \log(p_g)] \\ & + r [\log(1 - p_g^{\geq}) - \log(1 - p_g)] \end{aligned}$$

Here,  $p_g$  represents the maximum-likelihood parameter for gene  $g$  in the cluster under consideration,  $p_g^<$  represents this parameter computed only for cells with  $x_g < \theta_g$ , and  $p_g^{\geq}$  represents this parameter for cells with  $x_g \geq \theta_g$ . The only values of  $\theta$  for which a split need be

considered correspond to the expression levels of cells in the cluster, and  $\Delta Y_{g,\theta}$  can therefore be rapidly computed for all  $g$  and  $\theta$  using cumulative summation, with computational cost linear in the size of the expression matrix.

#### Full algorithm

The full algorithm consists of repeatedly alternating the EM algorithm with cluster splitting and merging operations to escape from local maxima. The algorithm is initialized by assigning all cells to a single cluster.

On each iteration, all clusters are first split in two using the splitting heuristic. Specifically, for each cluster,  $\Delta Y_{g,\theta}$  is computed for all  $g$  and  $\theta$ , and the optimal split points  $\theta_g$  are found for each gene. The ten genes giving top values of  $\Delta Y_{g,\theta_g}$  are found. For each of them, the cluster is split, an EM algorithm run to convergence on the resulting cluster pair, and the split providing the highest increase in likelihood is kept. Once all clusters have been split, they are combined to produce a dataset with twice the original number of clusters, and the EM algorithm is run it, to allow points to be reassigned between the split clusters.

The iteration ends with a round of cluster pruning. For each cluster we compute the deletion loss: the decrease in log likelihood that would occur if all points in the cluster were reassigned to their second-best matching cluster. If this loss does not outweigh the BIC penalty, the cluster's points are so reassigned, and EM is run on the full dataset. This process continues until no cluster's deletion loss is smaller than the BIC penalty.

The algorithm is run for a set number of iterations (50 in the current case) and the final result corresponds to the clustering that gave highest score.

#### Isolation metric

To measure how well separated each cluster is from its neighbors, we define an isolation metric equal to the deletion loss (described in the previous section), divided by  $N_k \log(2)$ , where  $N_k$  is the number of cells assigned to cluster  $k$ . This has an information-theoretic interpretation, as the number of additional bits that would be required to communicate the gene expression pattern of a cell in cluster  $k$ , using a code defined by the probability model if cluster  $k$  were deleted.

#### Hierarchical cluster clustering

Each cluster produced by the EM algorithm is specified by a mean expression vector. To understand the relationship between these cluster means, we applied a clustering method to the clusters themselves. This was achieved using Ward's method, with a distance matrix

given by the K-L divergence between cluster means, weighted by the number of cells per cluster.

### nbtSNE algorithm

To visualize the locations of the cells we derived a variant of the tSNE algorithm (Maaten and Hinton, 2008) appropriate for data following a negative binomial distribution.

Stochastic neighbour embedding algorithms such as tSNE start by converting Euclidean distances between pairs of high-dimensional vectors  $x_i$  into conditional probabilities according to a Gaussian distribution:  $p_{j|i} = N(x_j; x_i, \sigma_i^2) / \sum_{k \neq i} N(x_k; x_i, \sigma_i^2)$ . The tSNE algorithm then adjusts the locations of low-dimensional representation  $y_i$  in order to minimize the K-L divergence of a symmetrized  $p_{j|i}$ , with a t-distribution on the  $y_i$ .

The Gaussian distribution, however, is not the most appropriate choice for transcriptomic data. We found that we obtained better results using the same negative binomial distribution as in the ProMMT algorithm:

$$p_{j|i} = NB(x_j; x_i, r) / \sum_{k \neq i} NB(x_k; x_i, r)$$

Where

$$NB(x_j; x_i, r) = \exp \left[ \sum_{g \in S} x_{gj} \log \left( \frac{x_{gi}}{x_{gi} + r} \right) + r \log \left( \frac{r}{x_{gi} + r} \right) \right]$$

excluding a binomial coefficient that cancels when computing  $p_{j|i}$ . The sum runs over the set of genes  $g$  that were chosen by the ProMMT algorithm.

In the original tSNE algorithm, variations in distance between the points  $x_i$  are overcome by adjusting the variance  $\sigma_i^2$  for each point  $i$  to achieve constant perplexity of the symmetrized conditional distributions. We took the same approach, finding a scale factor  $\lambda_i$  for each cell  $i$  to ensure that the scaled symmetrized distribution

$$p_{ji} = \exp \lambda_i (\log(p_{j|i}) + \log(p_{i|j}))$$

had a fixed perplexity of 15. This computation, and the implementation K-L minimization was achieved using Laurens van der Maaten's drtoolbox (<https://lvdmaaten.github.io/drtoolbox/>).

For comparison, we ran a conventional tSNE analysis (**Figure S4**) using all genes, and the default parameters of the drtoolbox tSNE function. The nbtSNE analysis gave much more easily-interpretable results, which we ascribe to its use of a more appropriate probabilistic model.

### Latent factor analysis

To model continuous variation between cells, we used a negative binomial latent factor model. The model is parametrized by two matrices,  $\mathbf{W}$  and  $\mathbf{F}$  of size  $N_{genes} \times N_{factors}$  and  $N_{factors} \times N_{cells}$ . The distribution of each cell follows a negative-binomial distribution with mean  $\mu_{gc} = r \exp(\sum_f W_{gf} F_{fc})$ :

$$\Pr(x_{gc}; \mathbf{W}, \mathbf{F}) = NB \left( x_{gc}; r \exp \left( \sum_f W_{gf} F_{fc} \right), r \right)$$

This corresponds to the natural parameterization of the negative binomial,  $p = 1 / (1 + \exp(\sum_f W_{gf} F_{fc}))$ . As usual, we take a fixed value of  $r = 2$ . For the analysis described in this study, we use only a single latent factor, but add a second column to  $\mathbf{F}$  of all ones to allow the mean expression level to vary between genes.

Given a dataset  $x_{gc}$ , we fit the matrices  $\mathbf{W}$  and  $\mathbf{F}$  by maximum likelihood. As the negative binomial distribution with fixed  $r$  belongs to the exponential family, we can use the simple alternating method of Collins et al (2001). Note that we do not require a sparse algorithm because (unlike in clustering), the number of parameters is fixed. However to avoid instability, only genes that have reasonable expression levels in the database are kept (genes are included if at least 10 cells express at least 5 copies of the RNA), and a quadratic regularization penalty  $-50[|\mathbf{W}|^2 + |\mathbf{F}|^2]$  added to the log likelihood.

### Author Contributions

KDH initiated collaboration (with JH-L), devised and implemented transcriptomic data analyses (Figs. 1-6, S1-S7), identified cell classes, wrote manuscript.

CBG bred animals, performed Patch-Seq experiments, and analyzed data (Fig. 6).

HG and NGS optimized protocols for adult mice and performed single cell sequencing.

LM performed FISH and IHC experiments and cell counts (Figs. 8,9 and S8C).

LK performed IHC experiments and cell counts (Figs. 7, S8A,B).

PS performed IHC experiments and cell counts (Figs. 7, S8A,B) contributed to cell class identification and manuscript writing.

NK supervised FIH and IHC experiments (Figs. 8,9 and S8C).

SL supervised single-cell sequencing.

JH-L initiated collaboration (with KDH), supervised single-cell and Patch-Seq experiments and analysis, contributed to manuscript writing.

## Acknowledgements

We thank T. Viney, A. Joshi, G. Unal, and B. Bekkouche for discussions and comments on the manuscript. This work was supported by the Wellcome Trust (108726 to KDH, NK, PS, SL, and JH-L), Medical Research Council (PS) European Research Council (261063 to SL), Swedish Research Council (TARGET to SL, and 2014-3863 to JH-L), StratNeuro (JH-L), Knut and Alice Wallenberg Foundation (SL) and European Union FP7/Marie Curie Actions (322304 to JH-L).

## REFERENCES

- Acsady, L., Arabadzisz, D., and Freund, T.F. (1996a). Correlated morphological and neurochemical features identify different subsets of vasoactive intestinal polypeptide-immunoreactive interneurons in rat hippocampus. *Neuroscience* 73, 299–315.
- Acsady, L., Gorcs, T.J., and Freund, T.F. (1996b). Different populations of vasoactive intestinal polypeptide-immunoreactive interneurons are specialized to control pyramidal cells or interneurons in the hippocampus. *Neuroscience* 73, 317–334.
- Acsády, L., Pascual, M., Rocamora, N., Soriano, E., and Freund, T.F. (2000). Nerve growth factor but not neurotrophin-3 is synthesized by hippocampal GABAergic neurons that project to the medial septum. *Neuroscience* 98, 23–31.
- Armstrong, C., and Soltesz, I. (2012). Basket cell dichotomy in microcircuit function: Basket cells as dichotomous microcircuit modulators. *J. Physiol.* 590, 683–694.
- Armstrong, C., Krook-Magnuson, E., and Soltesz, I. (2012). Neurogliaform and Ivy Cells: A Major Family of nNOS Expressing GABAergic Neurons. *Front. Neural Circuits* 6.
- Bezaire, M.J., and Soltesz, I. (2013). Quantitative assessment of CA1 local circuits: knowledge base for interneuron-pyramidal cell connectivity. *Hippocampus* 23, 751–785.
- Bishop, C.M. (2006). *Pattern Recognition and Machine Learning* | Christopher Bishop | Springer (Springer verlag).
- Blasco-Ibanez, J.M., Martinez-Guijarro, F.J., and Freund, T.F. (1998). Enkephalin-containing interneurons are specialized to innervate other interneurons in the hippocampal CA1 region of the rat and guinea-pig. *Eur J Neurosci* 10, 1784–1795.
- Bouveyron, C., and Brunet-Saumard, C. (2014). Model-based clustering of high-dimensional data: A review. *Comput. Stat. Data Anal.* 71, 52–78.
- Buhl, E.H., Halasy, K., and Somogyi, P. (1994). Diverse sources of hippocampal unitary inhibitory postsynaptic potentials and the number of synaptic release sites [see comments] [published erratum appears in *Nature* 1997 May 1;387(6628):106]. *Nature* 368, 823–828.
- Cadwell, C.R., Palasantza, A., Jiang, X., Berens, P., Deng, Q., Yilmaz, M., Reimer, J., Shen, S., Bethge, M., Tolias, K.F., et al. (2016). Electrophysiological, transcriptomic and morphologic profiling of single neurons using Patch-seq. *Nat. Biotechnol.* 34, 199–203.
- Chittajallu, R., Craig, M.T., McFarland, A., Yuan, X., Gerfen, S., Tricoire, L., Erkkila, B., Barron, S.C., Lopez, C.M., Liang, B.J., et al. (2013). Dual origins of functionally distinct O-LM interneurons revealed by differential 5-HT(3A)R expression. *Nat Neurosci* 16, 1598–1607.
- Cho, J., Yu, N.-K., Choi, J.-H., Sim, S.-E., Kang, S.J., Kwak, C., Lee, S.-W., Kim, J., Choi, D.I., Kim, V.N., et al. (2015). Multiple repressive mechanisms in the hippocampus during memory formation. *Science* 350, 82–87.
- Choudhury, K., McQuillin, A., Puri, V., Pimm, J., Datta, S., Thirumalai, S., Krasucki, R., Lawrence, J., Bass, N.J., Quedest, D., et al. (2007). A genetic association study of chromosome 11q22–24 in two different samples implicates the FXYD6 gene, encoding phosphohippolin, in susceptibility to schizophrenia. *Am. J. Hum. Genet.* 80, 664–672.
- Cohen, S.M., Ma, H., Kuchibhotla, K.V., Watson, B.O., Buzsáki, G., Froemke, R.C., and Tsien, R.W. (2016). Excitation-Transcription Coupling in Parvalbumin-Positive Interneurons Employs a Novel CaM Kinase-Dependent Pathway Distinct from Excitatory Neurons. *Neuron* 90, 292–307.
- Collins, M., Dasgupta, S., and Schapire, R.E. (2001). A generalization of principal component analysis to the exponential family. In *Advances in Neural Information Processing Systems*, (MIT Press), p.
- Cope, D.W., Maccaferri, G., Marton, L.F., Roberts, J.D., Cobden, P.M., and Somogyi, P. (2002). Cholecystokinin-immunopositive basket and Schaffer collateral-associated interneurons target different domains of pyramidal cells in the CA1 area of the rat hippocampus. *Neuroscience* 109, 63–80.
- Daw, M.I., Tricoire, L., Erdelyi, F., Szabo, G., and McBain, C.J. (2009). Asynchronous transmitter release from cholecystokinin-containing inhibitory interneurons is widespread and target-cell independent. *J Neurosci* 29, 11112–11122.
- Dehorter, N., Ciceri, G., Bartolini, G., Lim, L., del Pino, I., and Marin, O. (2015). Tuning of fast-spiking interneuron properties by an activity-dependent transcriptional switch. *Science* 349, 1216–1220.
- Dempster, A.P., Laird, N.M., and Rubin, D.B. (1977). Maximum Likelihood from Incomplete Data via the EM Algorithm. *J. R. Stat. Soc. Ser. B Methodol.* 39, 1–38.
- Donato, F., Rompani, S.B., and Caroni, P. (2013). Parvalbumin-expressing basket-cell network plasticity induced by experience regulates adult learning. *Nature* 504, 272–276.
- Dudok, B., Barna, L., Ledri, M., Szabó, S.I., Szabadits, E., Pintér, B., Woodhams, S.G., Henstridge, C.M., Balla, G.Y., Nyilas, R., et al. (2015). Cell-specific STORM super-resolution imaging reveals nanoscale organization of cannabinoid signaling. *Nat. Neurosci.* 18, 75–86.
- Ferraguti, F., Klausberger, T., Cobden, P., Baude, A., Roberts, J.D., Szucs, P., Kinoshita, A., Shigemoto, R., Somogyi, P., and Dalezios, Y. (2005). Metabotropic glutamate receptor 8-

- expressing nerve terminals target subsets of GABAergic neurons in the hippocampus. *J Neurosci* 25, 10520–10536.
- Freund, T.F., and Buzsáki, G. (1996). Interneurons of the hippocampus. *Hippocampus* 6, 347–470.
- Fuentealba, P., Tomioka, R., Dalezios, Y., Marton, L.F., Studer, M., Rockland, K., Klausberger, T., and Somogyi, P. (2008a). Rhythmically active enkephalin-expressing GABAergic cells in the CA1 area of the hippocampus project to the subiculum and preferentially innervate interneurons. *J Neurosci* 28, 10017–10022.
- Fuentealba, P., Begum, R., Capogna, M., Jinno, S., Marton, L.F., Csicsvari, J., Thomson, A., Somogyi, P., and Klausberger, T. (2008b). Ivy cells: a population of nitric-oxide-producing, slow-spiking GABAergic neurons and their involvement in hippocampal network activity. *Neuron* 57, 917–929.
- Fuzik, J., Zeisel, A., Máté, Z., Calvigioni, D., Yanagawa, Y., Szabó, G., Linnarsson, S., and Harkany, T. (2016). Integration of electrophysiological recordings with single-cell RNA-seq data identifies neuronal subtypes. *Nat. Biotechnol.* 34, 175–183.
- Gerashchenko, D., Wisor, J.P., Burns, D., Reh, R.K., Shiromani, P.J., Sakurai, T., de la Iglesia, H.O., and Kilduff, T.S. (2008). Identification of a population of sleep-active cerebral cortex neurons. *Proc. Natl. Acad. Sci. U. S. A.* 105, 10227–10232.
- Gulyás, A.I., and Freund, T.F. (1996). Pyramidal cell dendrites are the primary targets of calbindin D28k-immunoreactive interneurons in the hippocampus. *Hippocampus* 6, 525–534.
- Gulyás, A.I., Hájos, N., and Freund, T.F. (1996). Interneurons containing calretinin are specialized to control other interneurons in the rat hippocampus. *J. Neurosci. Off. J. Soc. Neurosci.* 16, 3397–3411.
- Gulyás, A.I., Buzsáki, G., Freund, T.F., and Hirase, H. (2006). Populations of hippocampal inhibitory neurons express different levels of cytochrome c. *Eur. J. Neurosci.* 23, 2581–2594.
- Habib, N., Li, Y., Heidenreich, M., Swiech, L., Avraham-Davidi, I., Trombetta, J.J., Hession, C., Zhang, F., and Regev, A. (2016). Div-Seq: Single-nucleus RNA-Seq reveals dynamics of rare adult newborn neurons. *Science* 353, 925–928.
- Habib, N., Basu, A., Avraham-Davidi, I., Burks, T., Choudhury, S.R., Aguet, F., Gelfand, E., Ardlie, K., Weitz, D.A., Rozenblatt-Rosen, O., et al. (2017). DroNc-Seq: Deciphering cell types in human archived brain tissues by massively-parallel single nucleus RNA-seq. *bioRxiv*.
- Hefft, S., and Jonas, P. (2005). Asynchronous GABA release generates long-lasting inhibition at a hippocampal interneuron–principal neuron synapse. *Nat. Neurosci.* 8, 1319–1328.
- Hu, H., Gan, J., and Jonas, P. (2014). Interneurons. Fast-spiking, parvalbumin<sup>+</sup> GABAergic interneurons: from cellular design to microcircuit function. *Science* 345, 1255–1263.
- Jinno, S. (2009). Structural organization of long-range GABAergic projection system of the hippocampus. *Front Neuroanat* 3, 13.
- Jinno, S., and Kosaka, T. (2004). Patterns of colocalization of neuronal nitric oxide synthase and somatostatin-like immunoreactivity in the mouse hippocampus: quantitative analysis with optical disector. *Neuroscience* 124, 797–808.
- Jinno, S., Klausberger, T., Marton, L.F., Dalezios, Y., Roberts, J.D., Fuentealba, P., Bushong, E.A., Henze, D., Buzsáki, G., and Somogyi, P. (2007). Neuronal diversity in GABAergic long-range projections from the hippocampus. *J Neurosci* 27, 8790–8804.
- Katona, L., Lapray, D., Viney, T.J., Oulhaj, A., Borhegyi, Z., Micklem, B.R., Klausberger, T., and Somogyi, P. (2014). Sleep and movement differentiates actions of two types of somatostatin-expressing GABAergic interneuron in rat hippocampus. *Neuron* 82, 872–886.
- Katona, L., Micklem, B., Borhegyi, Z., Swiejkowski, D.A., Valenti, O., Viney, T.J., Kotzadimitriou, D., Klausberger, T., and Somogyi, P. (2017). Behavior-dependent activity patterns of GABAergic long-range projecting neurons in the rat hippocampus. *Hippocampus* 27, 359–377.
- Klausberger, T., and Somogyi, P. (2008). Neuronal diversity and temporal dynamics: the unity of hippocampal circuit operations. *Science* 321, 53–57.
- Klausberger, T., Marton, L.F., O’Neill, J., Huck, J.H., Dalezios, Y., Fuentealba, P., Suen, W.Y., Papp, E., Kaneko, T., Watanabe, M., et al. (2005). Complementary roles of cholecystokinin- and parvalbumin-expressing GABAergic neurons in hippocampal network oscillations. *J Neurosci* 25, 9782–9793.
- Lee, S.-H., Földy, C., and Soltesz, I. (2010). Distinct endocannabinoid control of GABA release at perisomatic and dendritic synapses in the hippocampus. *J. Neurosci. Off. J. Soc. Neurosci.* 30, 7993–8000.
- Lein, E.S., Hawrylycz, M.J., Ao, N., Ayres, M., Bensinger, A., Bernard, A., Boe, A.F., Boguski, M.S., Brockway, K.S., Byrnes, E.J., et al. (2007). Genome-wide atlas of gene expression in the adult mouse brain. *Nature* 445, 168–176.
- Losonczy, A., Zhang, L., Shigemoto, R., Somogyi, P., and Nusser, Z. (2002). Cell type dependence and variability in the short-term plasticity of EPSCs in identified mouse hippocampal interneurons. *J. Physiol.* 542, 193–210.
- Lu, J., Tomfohr, J.K., and Kepler, T.B. (2005). Identifying differential expression in multiple SAGE libraries: an overdispersed log-linear model approach. *BMC Bioinformatics* 6, 165.
- Maaten, L. van der, and Hinton, G. (2008). Visualizing Data using t-SNE. *J. Mach. Learn. Res.* 9, 2579–2605.
- Macosko, E.Z., Basu, A., Satija, R., Nemes, J., Shekhar, K., Goldman, M., Tirosh, I., Bialas, A.R., Kamitaki, N., Martersteck, E.M., et al. (2015). Highly Parallel Genome-wide Expression Profiling of Individual Cells Using Nanoliter Droplets. *Cell* 161, 1202–1214.
- Magno, L., Oliveira, M.G., Mucha, M., Rubin, A.N., and Kessaris, N. (2012). Multiple embryonic origins of nitric oxide synthase-expressing GABAergic neurons of the neocortex. *Front Neural Circuits* 6, 65.
- Mardinly, A.R., Spiegel, I., Patrizi, A., Centofante, E., Bazinet, J.E., Tzeng, C.P., Mandel-Brehm, C., Harmin, D.A., Adesnik, H., Fagiolini, M., et al. (2016). Sensory experience regulates cortical inhibition by inducing IGF1 in VIP neurons. *Nature* 531, 371–375.
- Markram, H., Toledo-Rodriguez, M., Wang, Y., Gupta, A., Silberberg, G., and Wu, C. (2004). Interneurons of the neocortical inhibitory system. *Nat.Rev.Neurosci.* 5, 793–807.

- Martínez-Guijarro, F.J., Briñón, J.G., Blasco-Ibáñez, J.M., Okazaki, K., Hidaka, H., and Alonso, J.R. (1998). Neurocalcin-immunoreactive cells in the rat hippocampus are GABAergic interneurons. *Hippocampus* 8, 2–23.
- Miyashita, T., and Rockland, K.S. (2007). GABAergic projections from the hippocampus to the retrosplenial cortex in the rat. *Eur J Neurosci* 26, 1193–1204.
- Ogiwara, I., Iwasato, T., Miyamoto, H., Iwata, R., Yamagata, T., Mazaki, E., Yanagawa, Y., Tamamaki, N., Hensch, T.K., Itohara, S., et al. (2013). Nav1.1 haploinsufficiency in excitatory neurons ameliorates seizure-associated sudden death in a mouse model of Dravet syndrome. *Hum. Mol. Genet.* 22, 4784–4804.
- Parra, P., Gulyas, A.I., and Miles, R. (1998). How many subtypes of inhibitory cells in the hippocampus? *Neuron* 20, 983–993.
- Pawelzik, H., Hughes, D.I., and Thomson, A.M. (2002). Physiological and morphological diversity of immunocytochemically defined parvalbumin- and cholecystokinin-positive interneurons in CA1 of the adult rat hippocampus. *J. Comp. Neurol.* 443, 346–367.
- Price, C.J., Cauli, B., Kovacs, E.R., Kulik, A., Lambolez, B., Shigemoto, R., and Capogna, M. (2005). Neurogliaform neurons form a novel inhibitory network in the hippocampal CA1 area. *J. Neurosci. Off. J. Soc. Neurosci.* 25, 6775–6786.
- Robinson, M.D., and Smyth, G.K. (2008). Small-sample estimation of negative binomial dispersion, with applications to SAGE data. *Biostatistics* 9, 321–332.
- Schwarz, G. (1978). Estimating the Dimension of a Model. *Ann. Stat.* 6, 461–464.
- Sik, A., Ylinen, A., Penttonen, M., and Buzsáki, G. (1994). Inhibitory CA1-CA3-hilar region feedback in the hippocampus. *Science* 265, 1722–1724.
- Somogyi, P. (2010). Hippocampus: intrinsic organization. In *Handbook of Brain Microcircuits*, G.M. Shepherd, and S. Grillner, eds. (New York: Oxford University Press), p.
- Somogyi, J., Baude, A., Omori, Y., Shimizu, H., El Mestikawy, S., Fukaya, M., Shigemoto, R., Watanabe, M., and Somogyi, P. (2004). GABAergic basket cells expressing cholecystokinin contain vesicular glutamate transporter type 3 (VGLUT3) in their synaptic terminals in hippocampus and isocortex of the rat. *Eur J Neurosci* 19, 552–569.
- Spiegel, I., Mardinly, A.R., Gabel, H.W., Bazinet, J.E., Couch, C.H., Tzeng, C.P., Harmin, D.A., and Greenberg, M.E. (2014). Npas4 regulates excitatory-inhibitory balance within neural circuits through cell-type-specific gene programs. *Cell* 157, 1216–1229.
- Takács, V.T., Freund, T.F., and Gulyás, A.I. (2008). Types and synaptic connections of hippocampal inhibitory neurons reciprocally connected with the medial septum. *Eur. J. Neurosci.* 28, 148–164.
- Tasic, B., Menon, V., Nguyen, T.N., Kim, T.K., Jarsky, T., Yao, Z., Levi, B., Gray, L.T., Sorensen, S.A., Dolbeare, T., et al. (2016). Adult mouse cortical cell taxonomy revealed by single cell transcriptomics. *Nat. Neurosci.* 19, 335–346.
- Tricoire, L., Pelkey, K.A., Daw, M.I., Sousa, V.H., Miyoshi, G., Jeffries, B., Cauli, B., Fishell, G., and McBain, C.J. (2010). Common origins of hippocampal Ivy and nitric oxide synthase expressing neurogliaform cells. *J Neurosci* 30, 2165–2176.
- Tricoire, L., Pelkey, K.A., Erkkila, B.E., Jeffries, B.W., Yuan, X., and McBain, C.J. (2011). A blueprint for the spatiotemporal origins of mouse hippocampal interneuron diversity. *J Neurosci* 31, 10948–10970.
- Tyan, L., Chamberland, S., Magnin, E., Camire, O., Francavilla, R., David, L.S., Deisseroth, K., and Topolnik, L. (2014). Dendritic inhibition provided by interneuron-specific cells controls the firing rate and timing of the hippocampal feedback inhibitory circuitry. *J Neurosci* 34, 4534–4547.
- Usoskin, D., Furlan, A., Islam, S., Abdo, H., Lonnerberg, P., Lou, D., Hjerling-Leffler, J., Haeggstrom, J., Kharchenko, O., Kharchenko, P.V., et al. (2015). Unbiased classification of sensory neuron types by large-scale single-cell RNA sequencing. *Nat Neurosci* 18, 145–153.
- Viney, T.J., Lasztocki, B., Katona, L., Crump, M.G., Tukker, J.J., Klausberger, T., and Somogyi, P. (2013). Network state-dependent inhibition of identified hippocampal CA3 axo-axonic cells in vivo. *Nat. Neurosci.* 16, 1802–1811.
- Vruwink, M., Schmidt, H.H., Weinberg, R.J., and Burette, A. (2001). Substance P and nitric oxide signaling in cerebral cortex: anatomical evidence for reciprocal signaling between two classes of interneurons. *J. Comp. Neurol.* 441, 288–301.
- Wheeler, D.W., White, C.M., Rees, C.L., Komendantov, A.O., Hamilton, D.J., and Ascoli, G.A. (2015). Hippocampome.org: a knowledge base of neuron types in the rodent hippocampus. *Elife* 4.
- Xu, X., Roby, K.D., and Callaway, E.M. (2006). Mouse cortical inhibitory neuron type that coexpresses somatostatin and calretinin. *J. Comp. Neurol.* 499, 144–160.
- Zeisel, A., Munoz-Manchado, A.B., Codeluppi, S., Lonnerberg, P., La Manno, G., Jureus, A., Marques, S., Munguba, H., He, L., Betsholtz, C., et al. (2015). Brain structure. Cell types in the mouse cortex and hippocampus revealed by single-cell RNA-seq. *Science* 347, 1138–1142.
